# Supplementary material for: Meta-Analysis of Salt Stress Transcriptome Responses in Different Rice Genotypes at the Seedling Stage
Source: MDPI journal article supplement (doi:10.3390/plants8030064), 2019-03-12
Supplement: s1 [file s1]

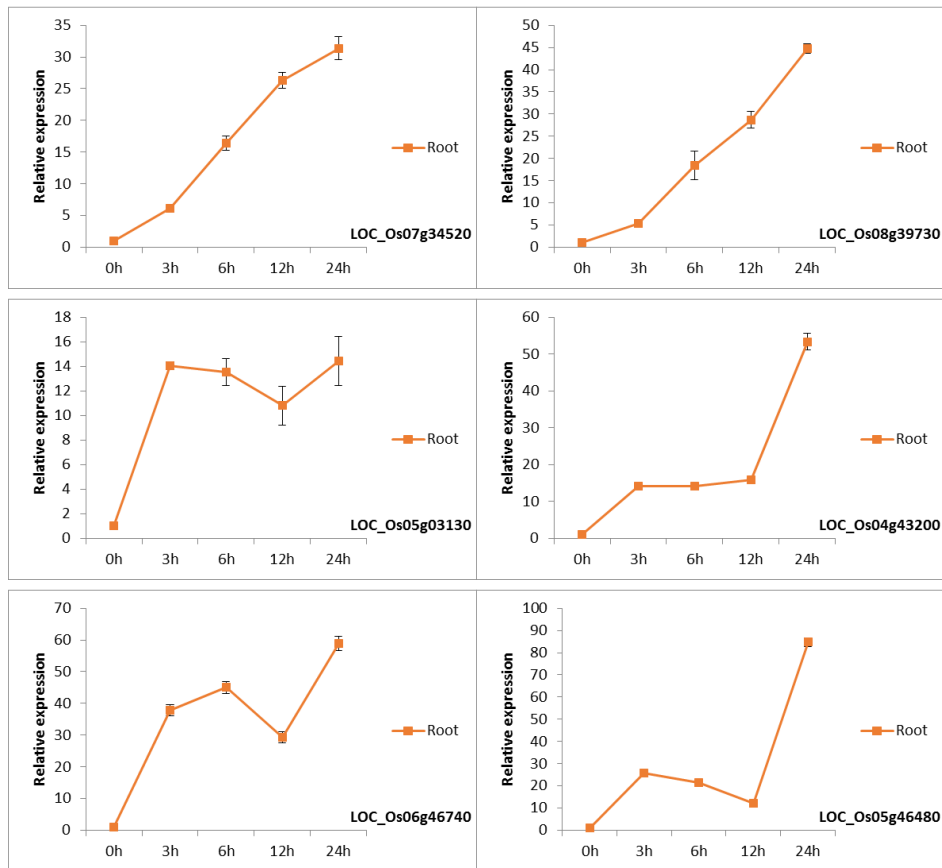

Expression pattern of the 6 DEGs in 'Nipponbare' seedling roots after NaCl treatment 0h, 3h, 6h, 12h, and 24h. The  $2^{-\Delta\Delta CT}$  method is adopted to calculate the fold change of DEGs expression from three biological replicates.
