# Supplementary figures and images for: Meta-Analysis of Salt Stress Transcriptome Responses in Different Rice Genotypes at the Seedling Stage
Source: MDPI journal article supplement (doi:10.3390/plants8030064), 2019-03-12

TCN1

3h

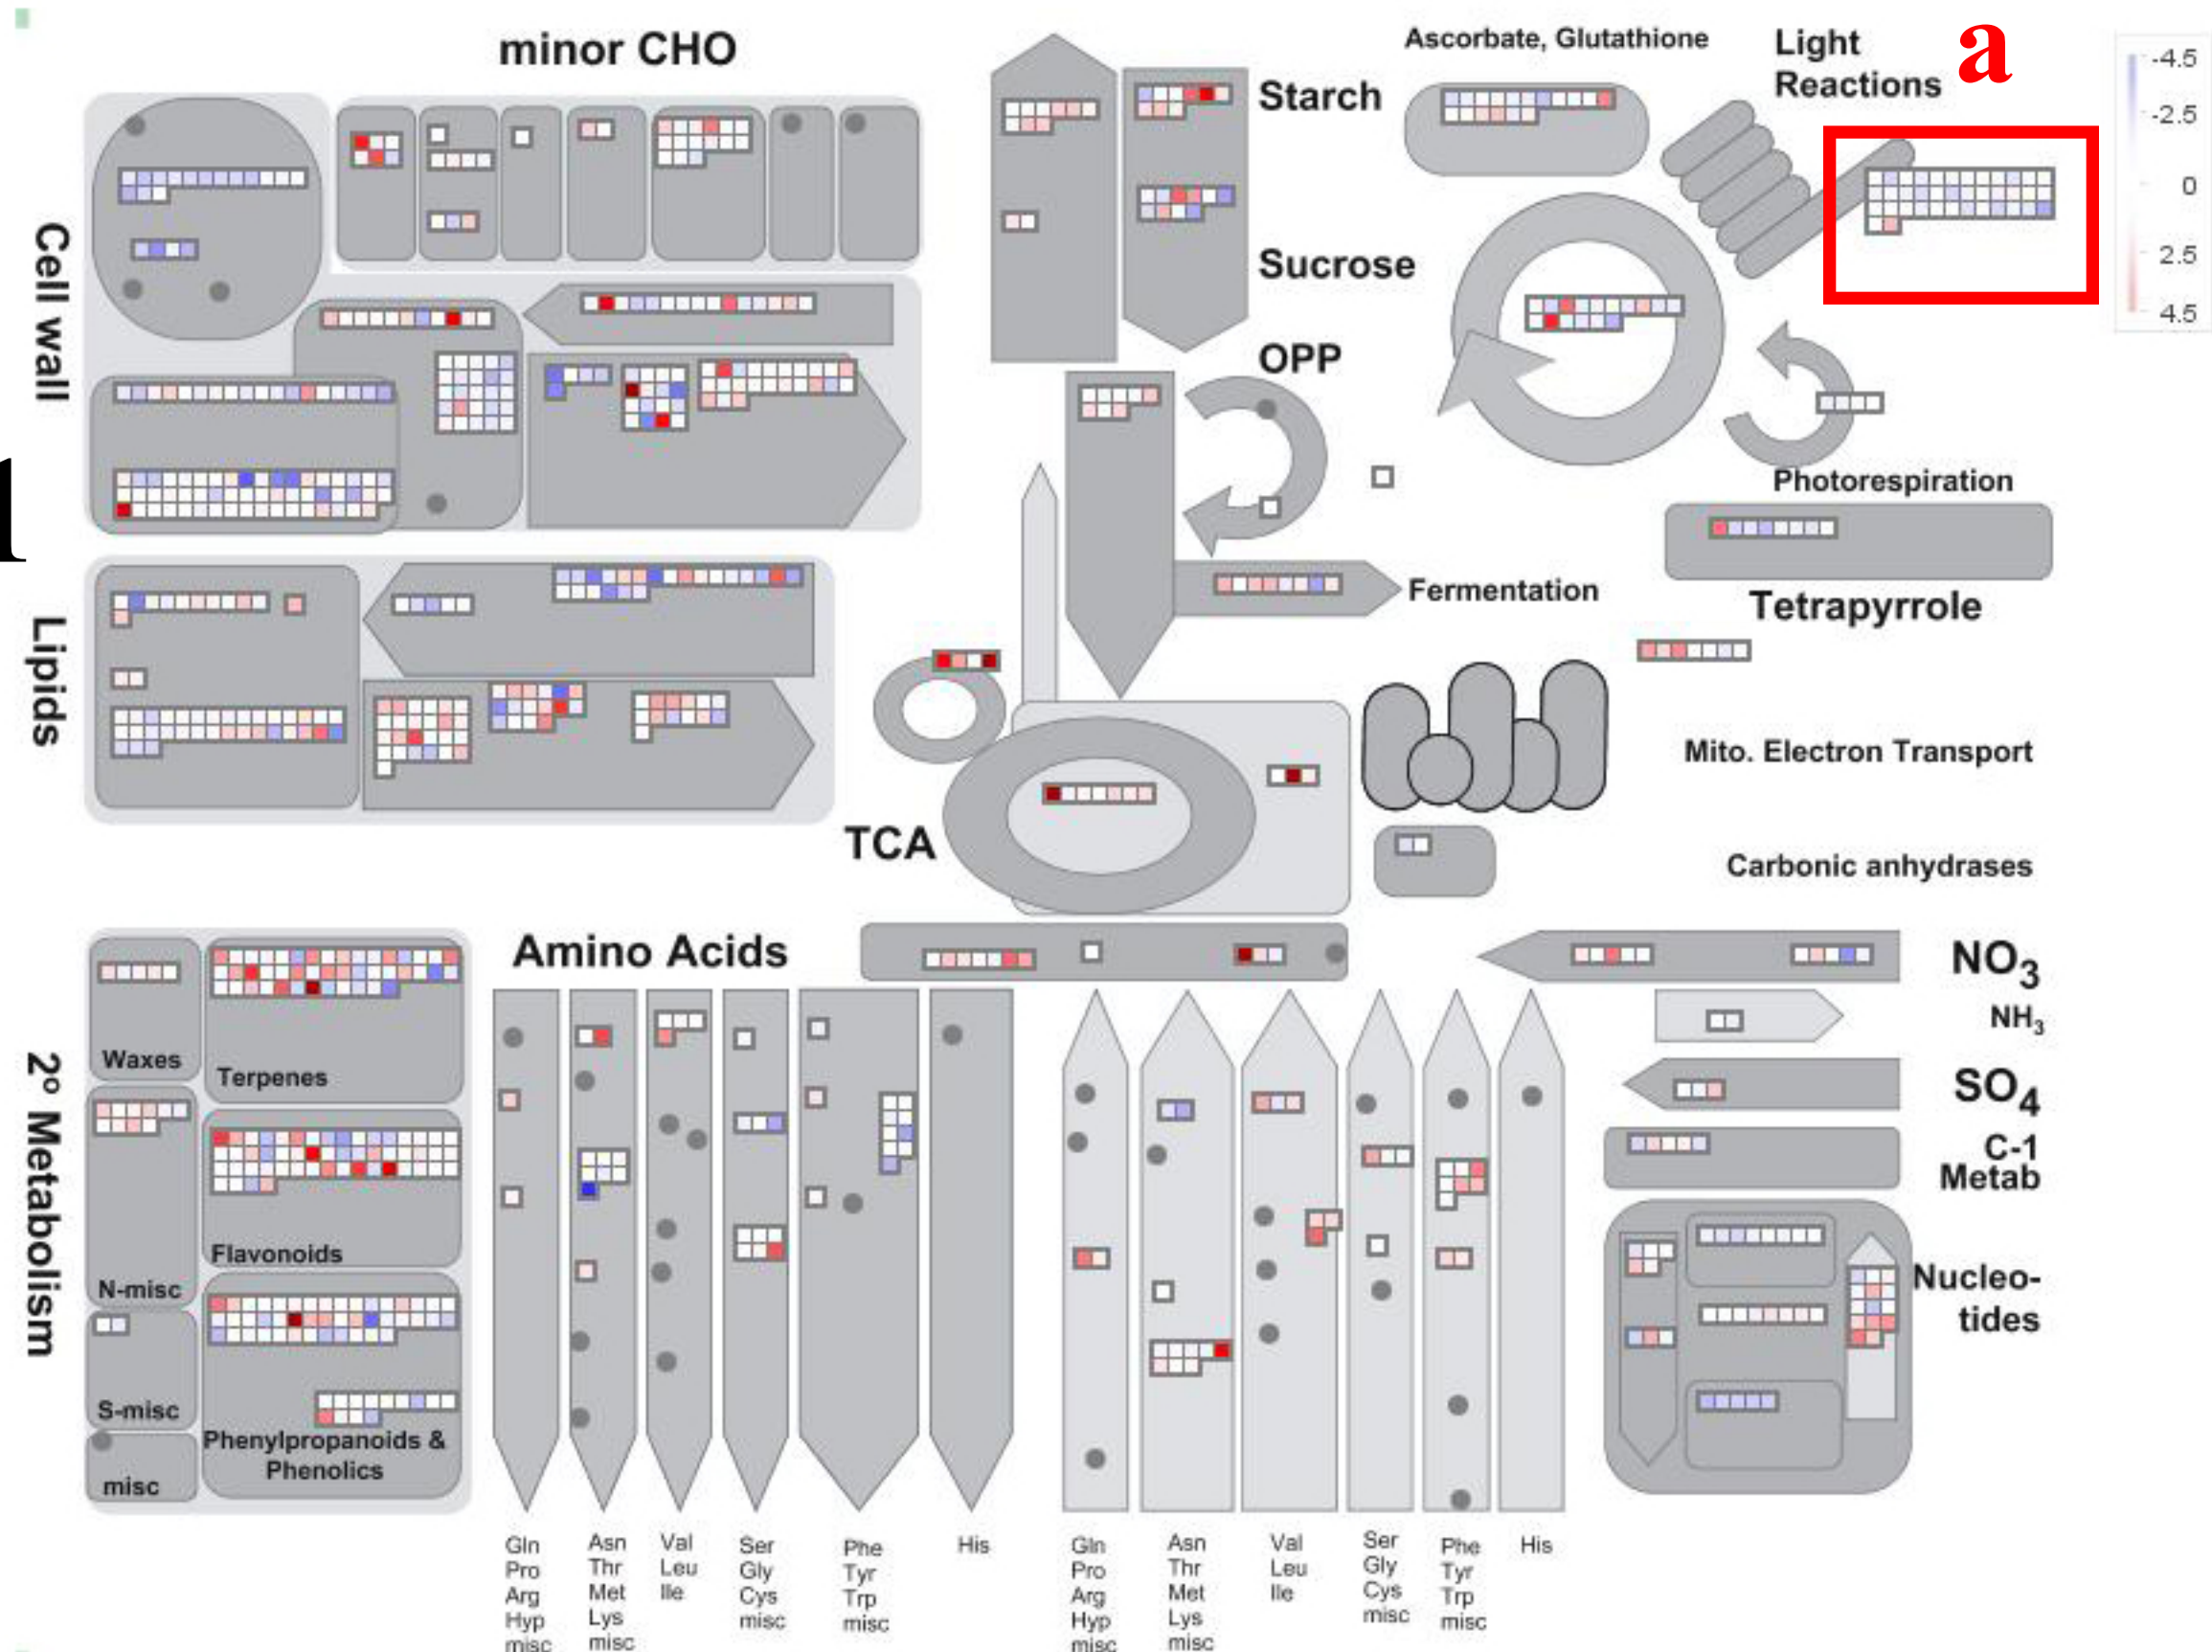

TNG67

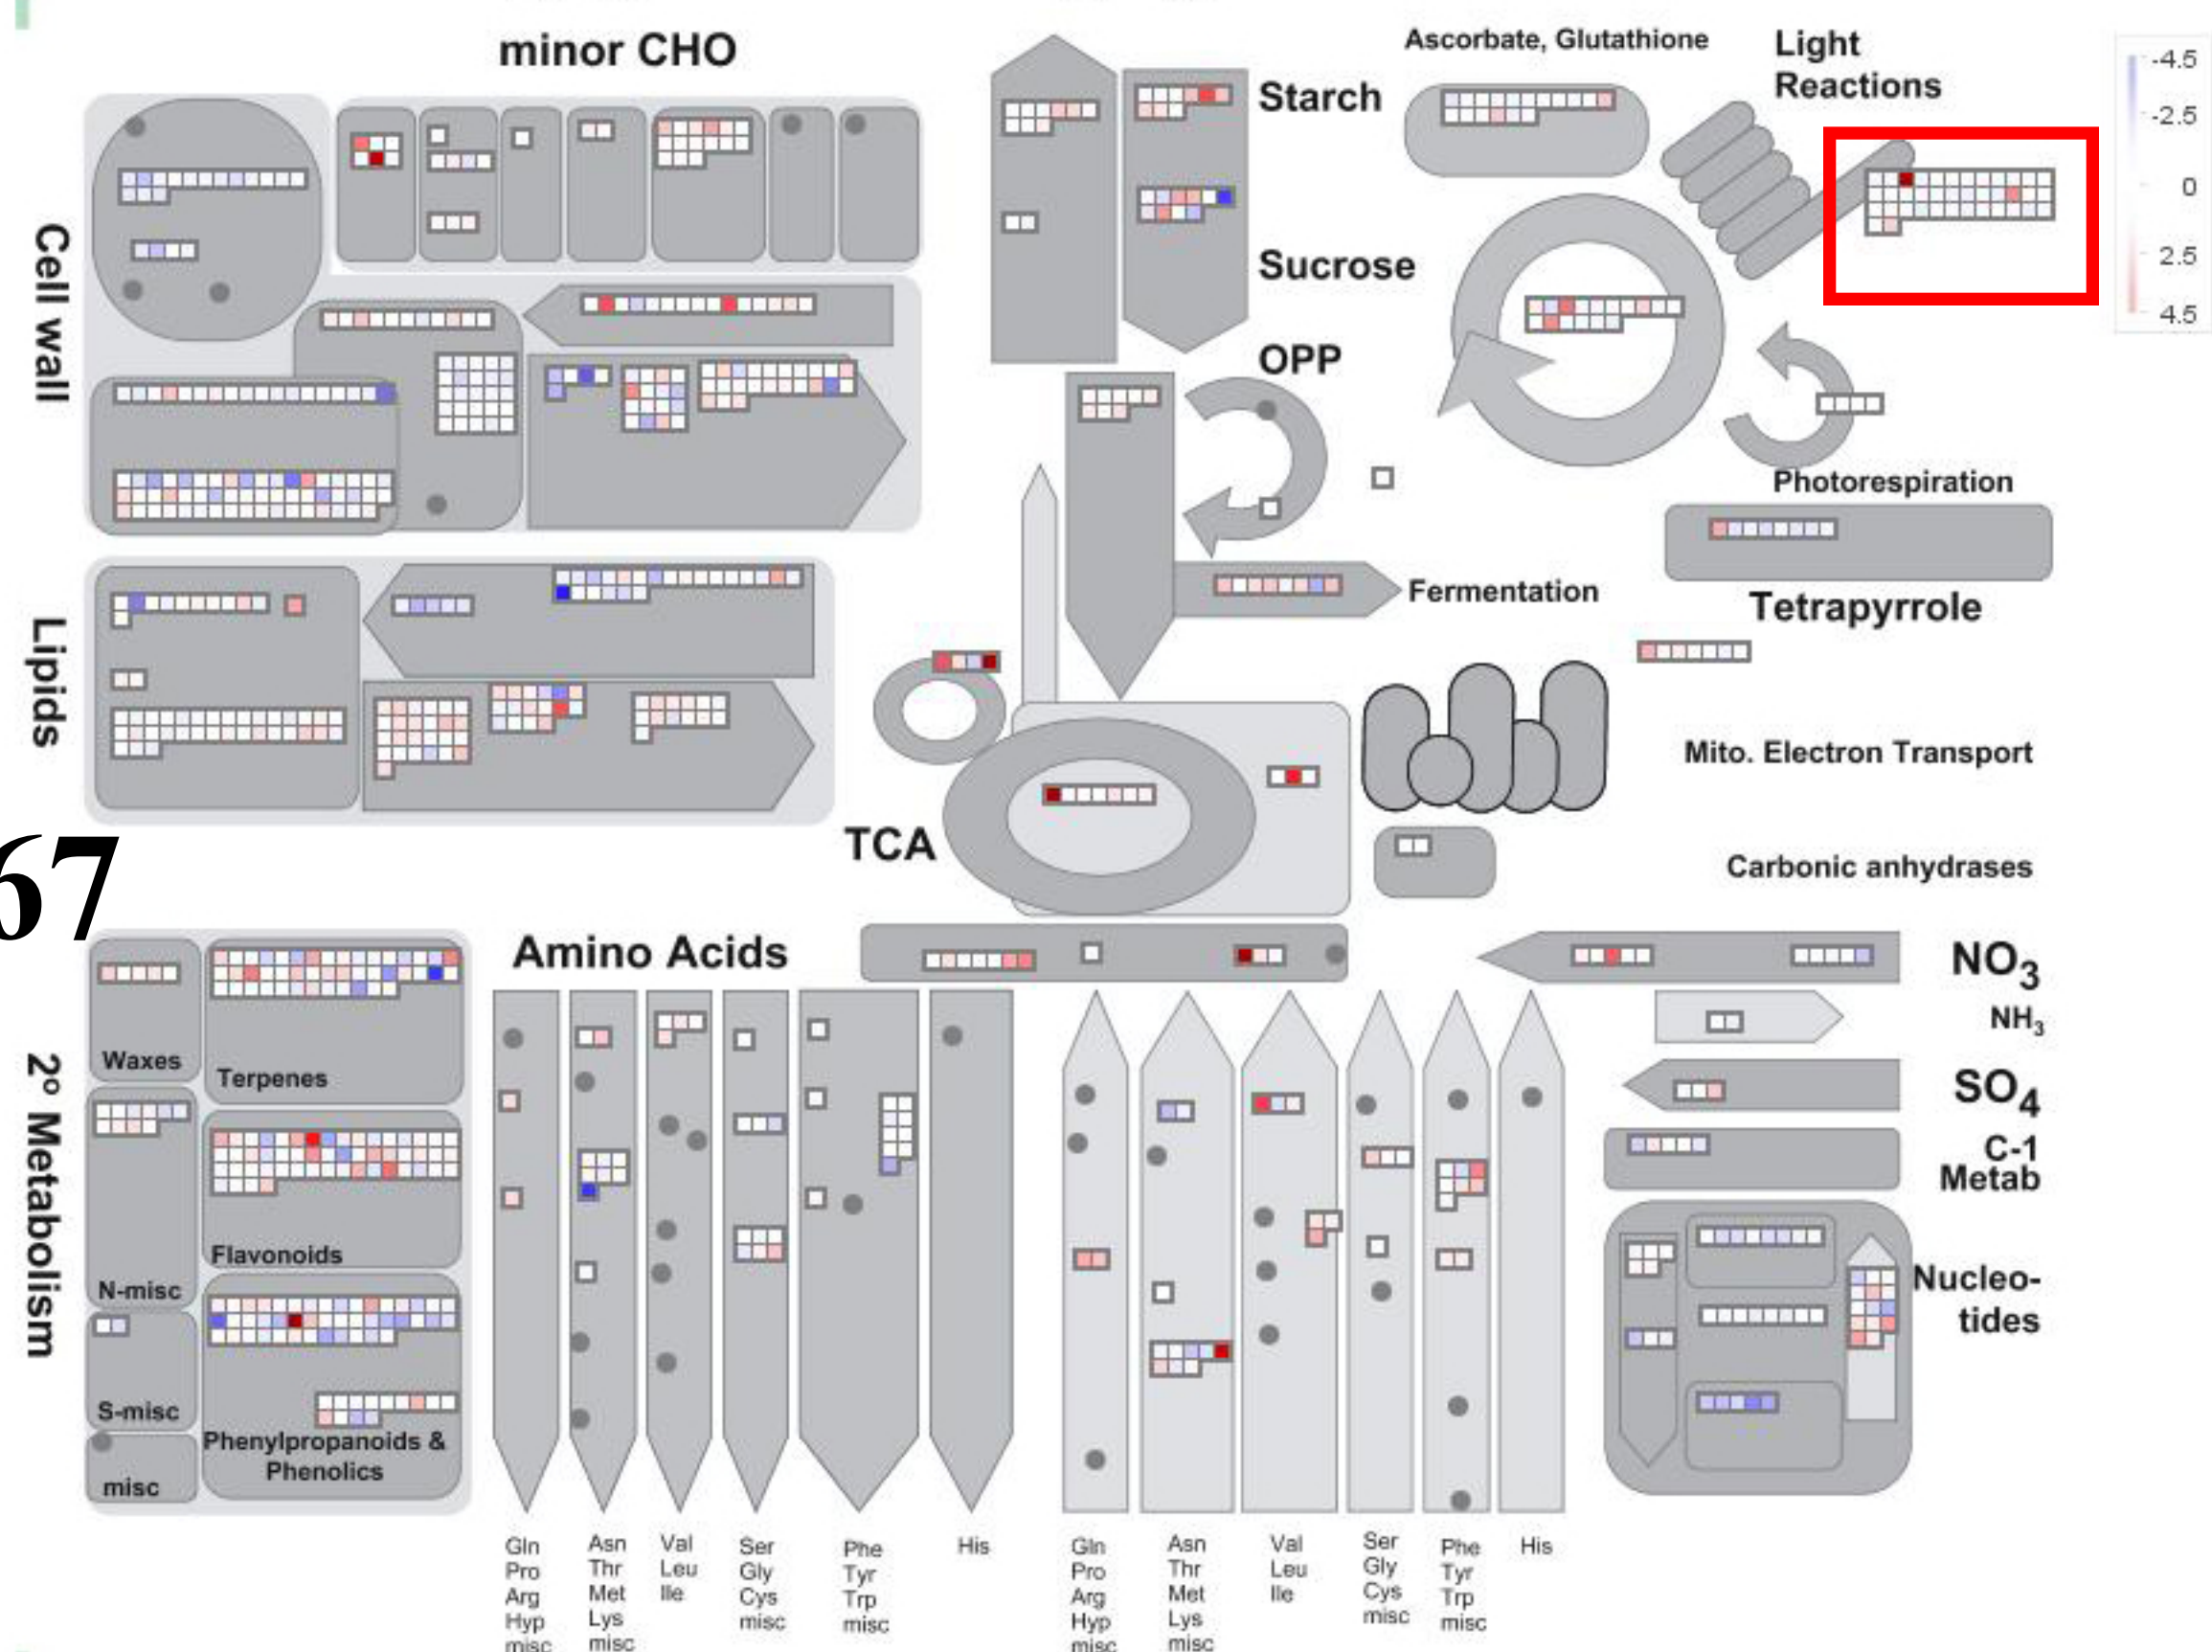

24h

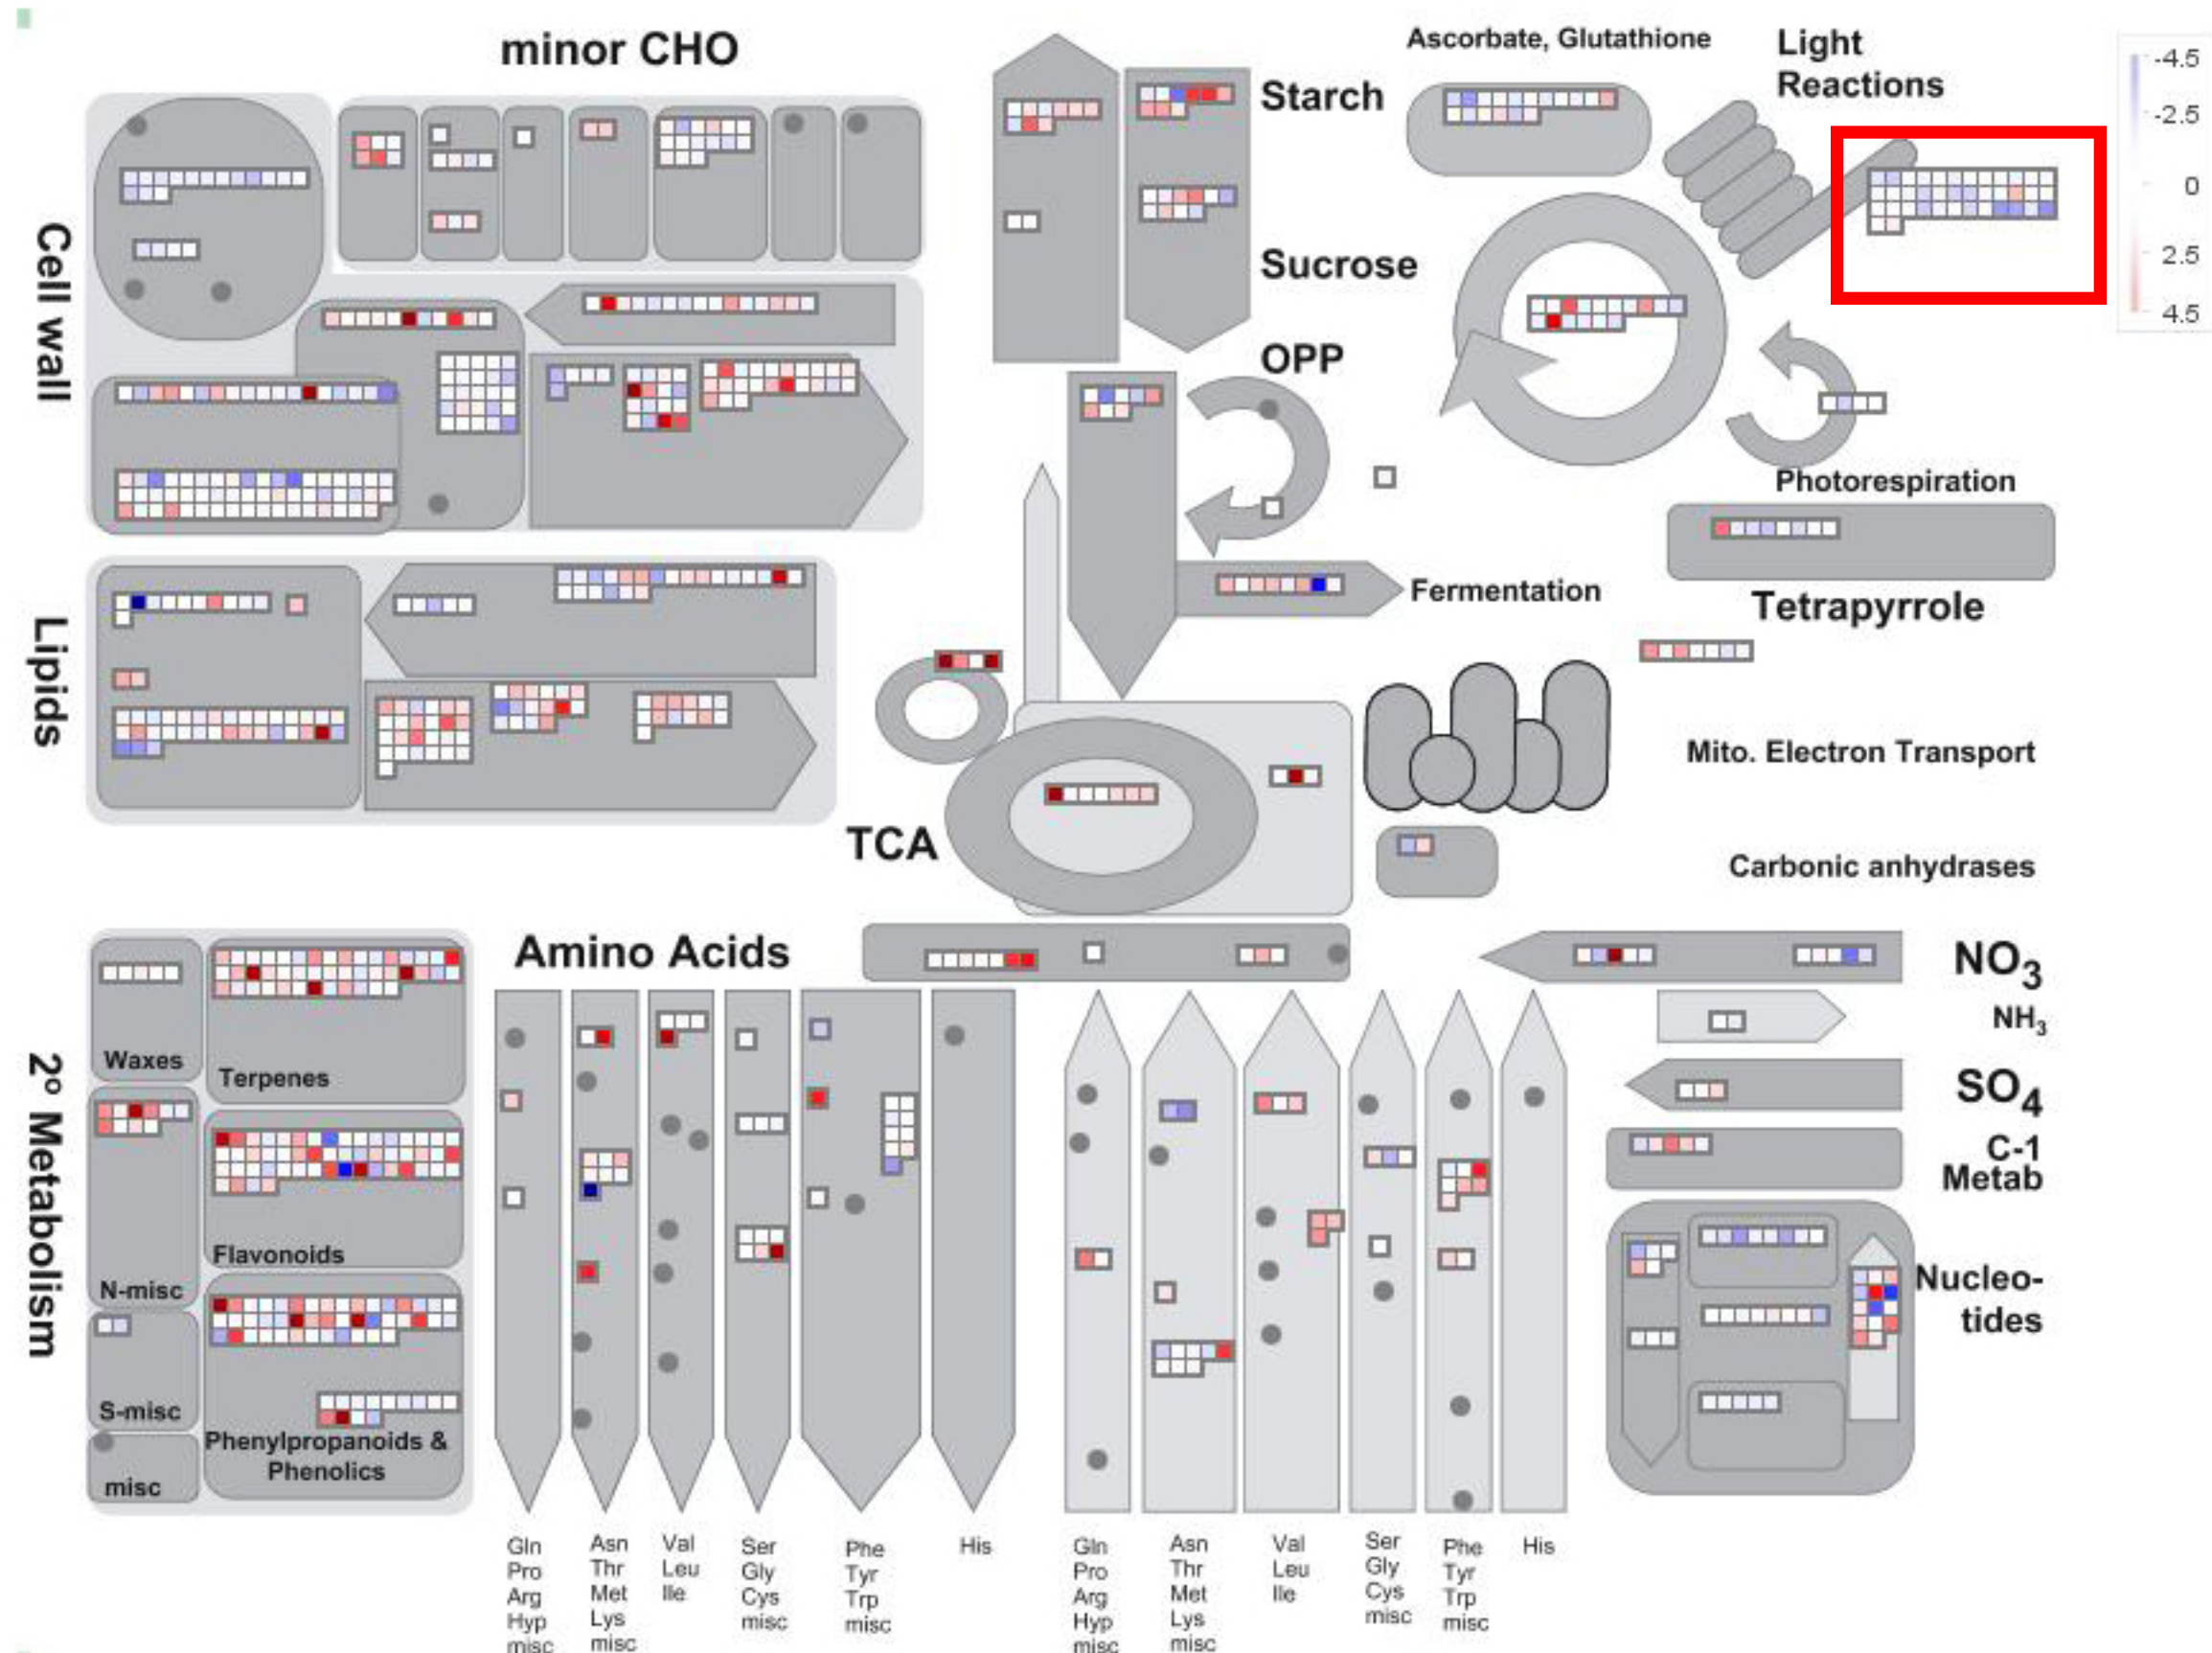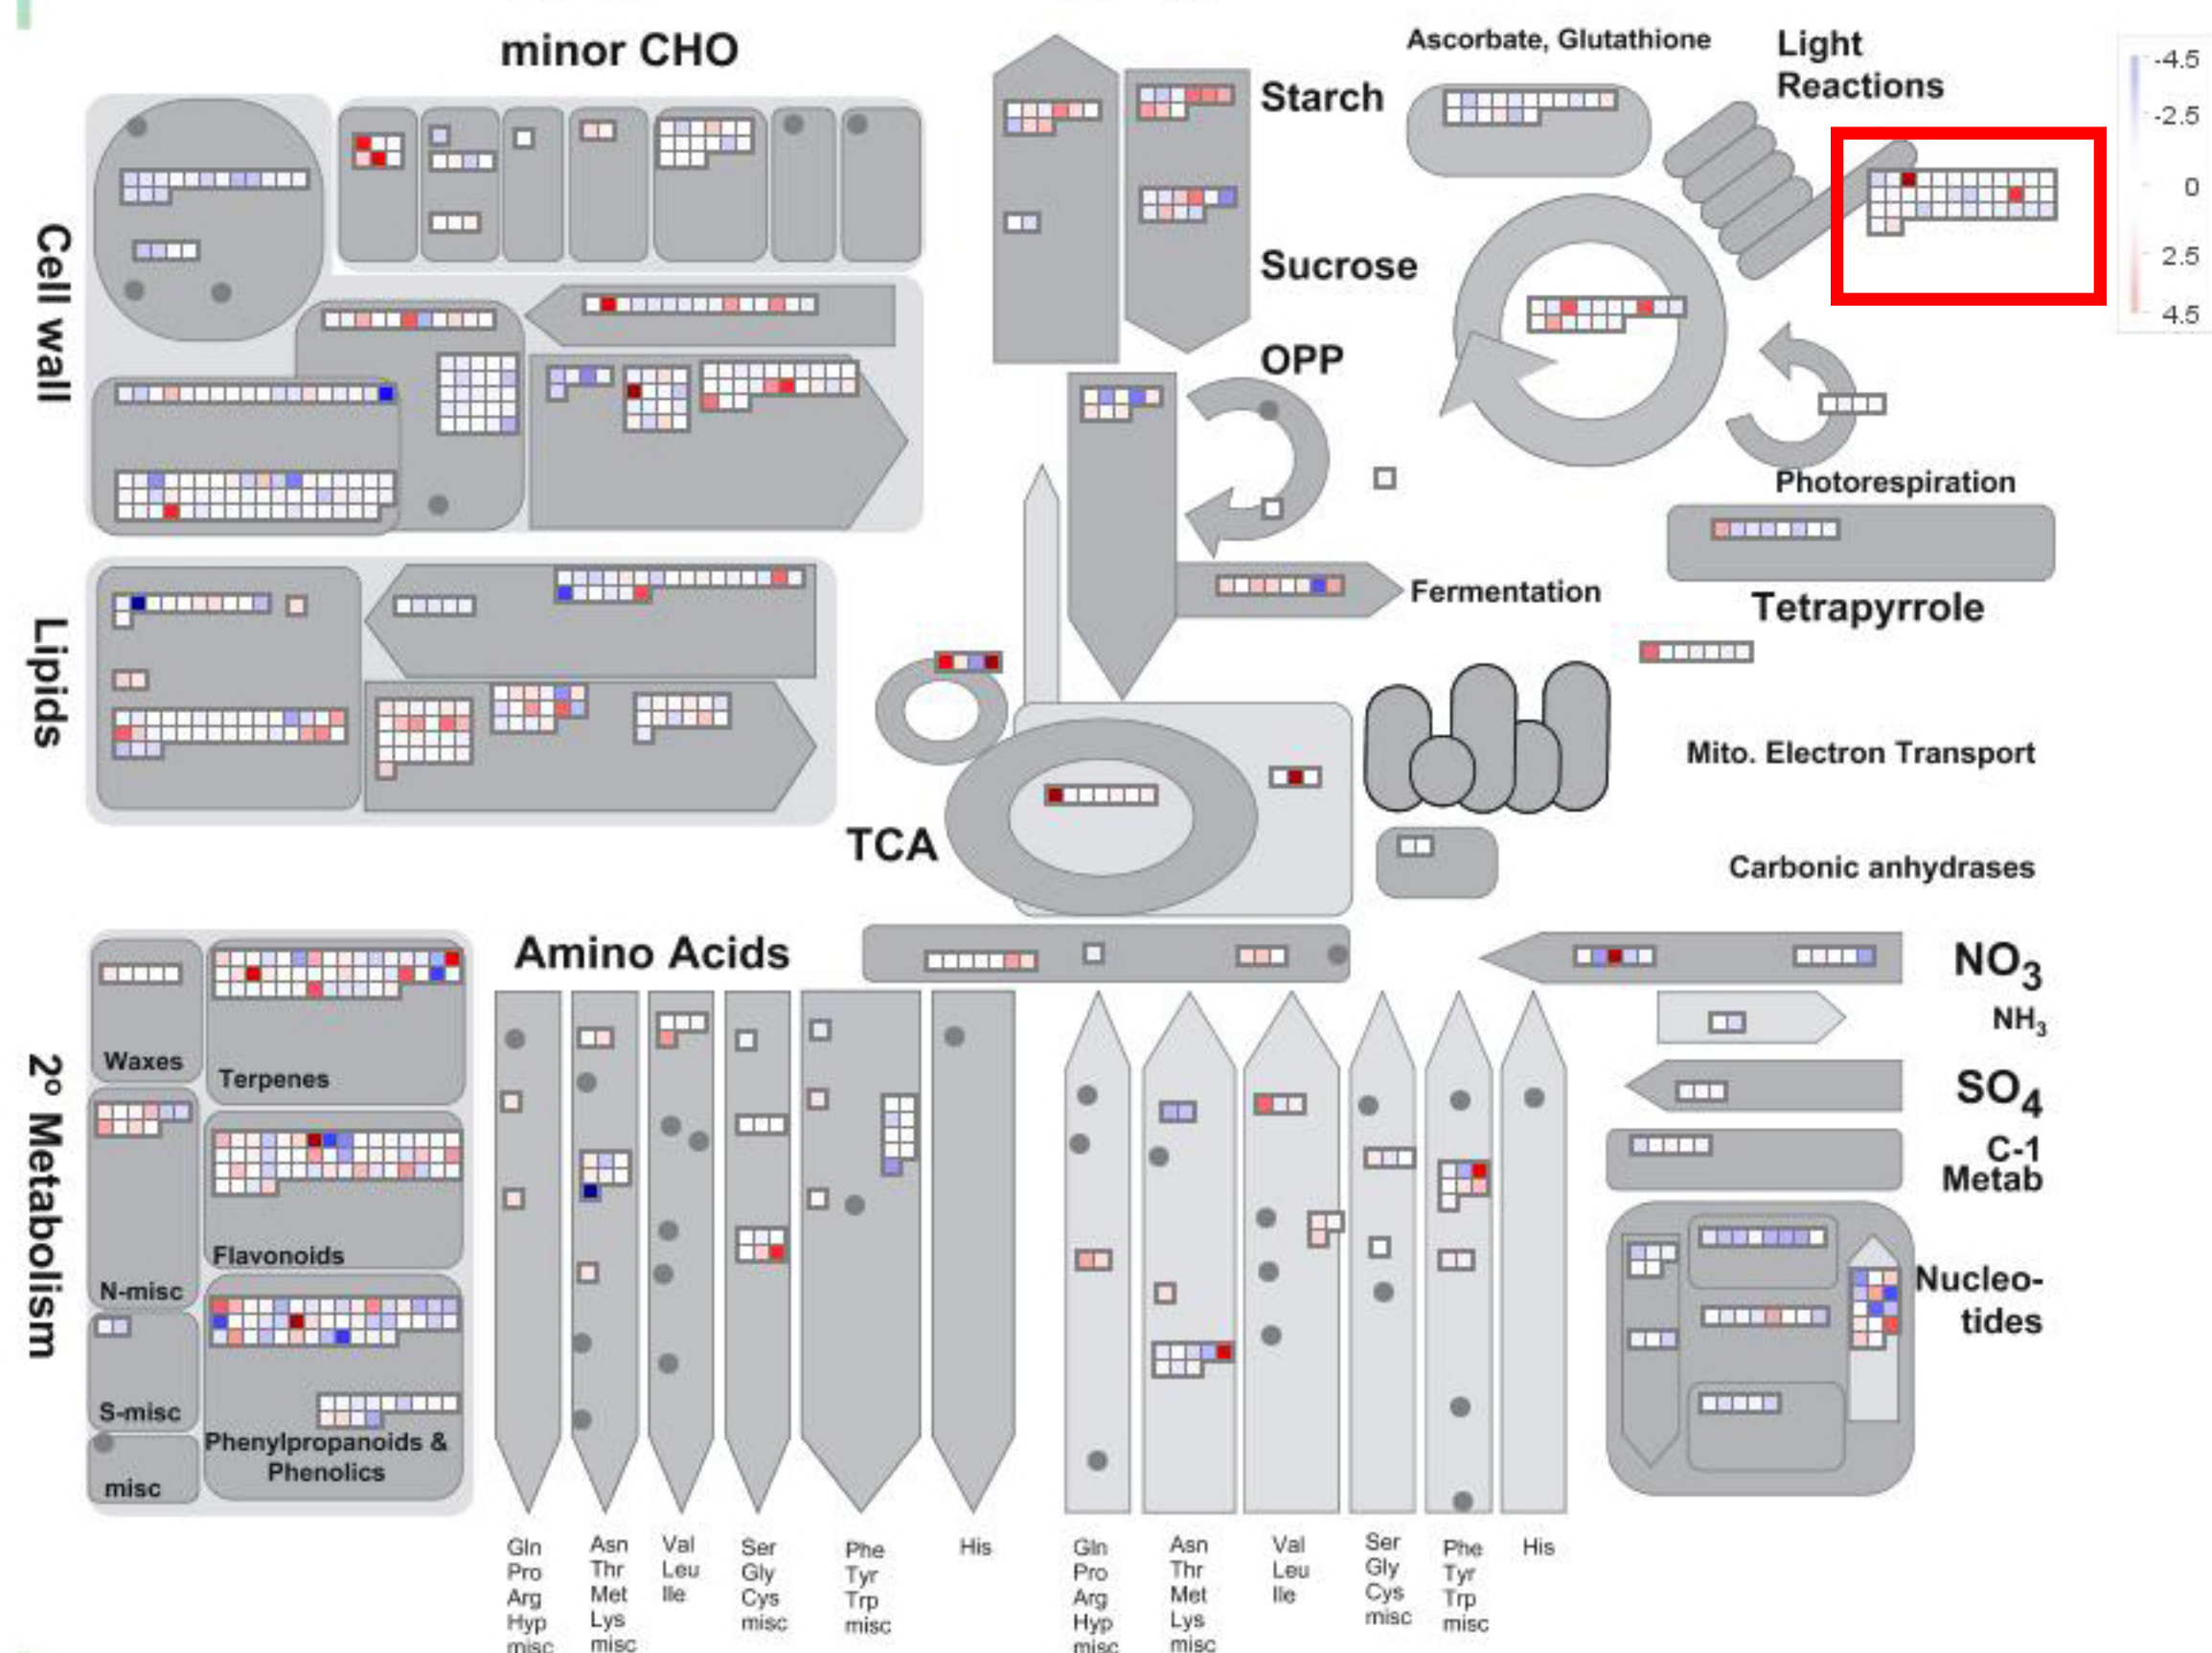

Re24h

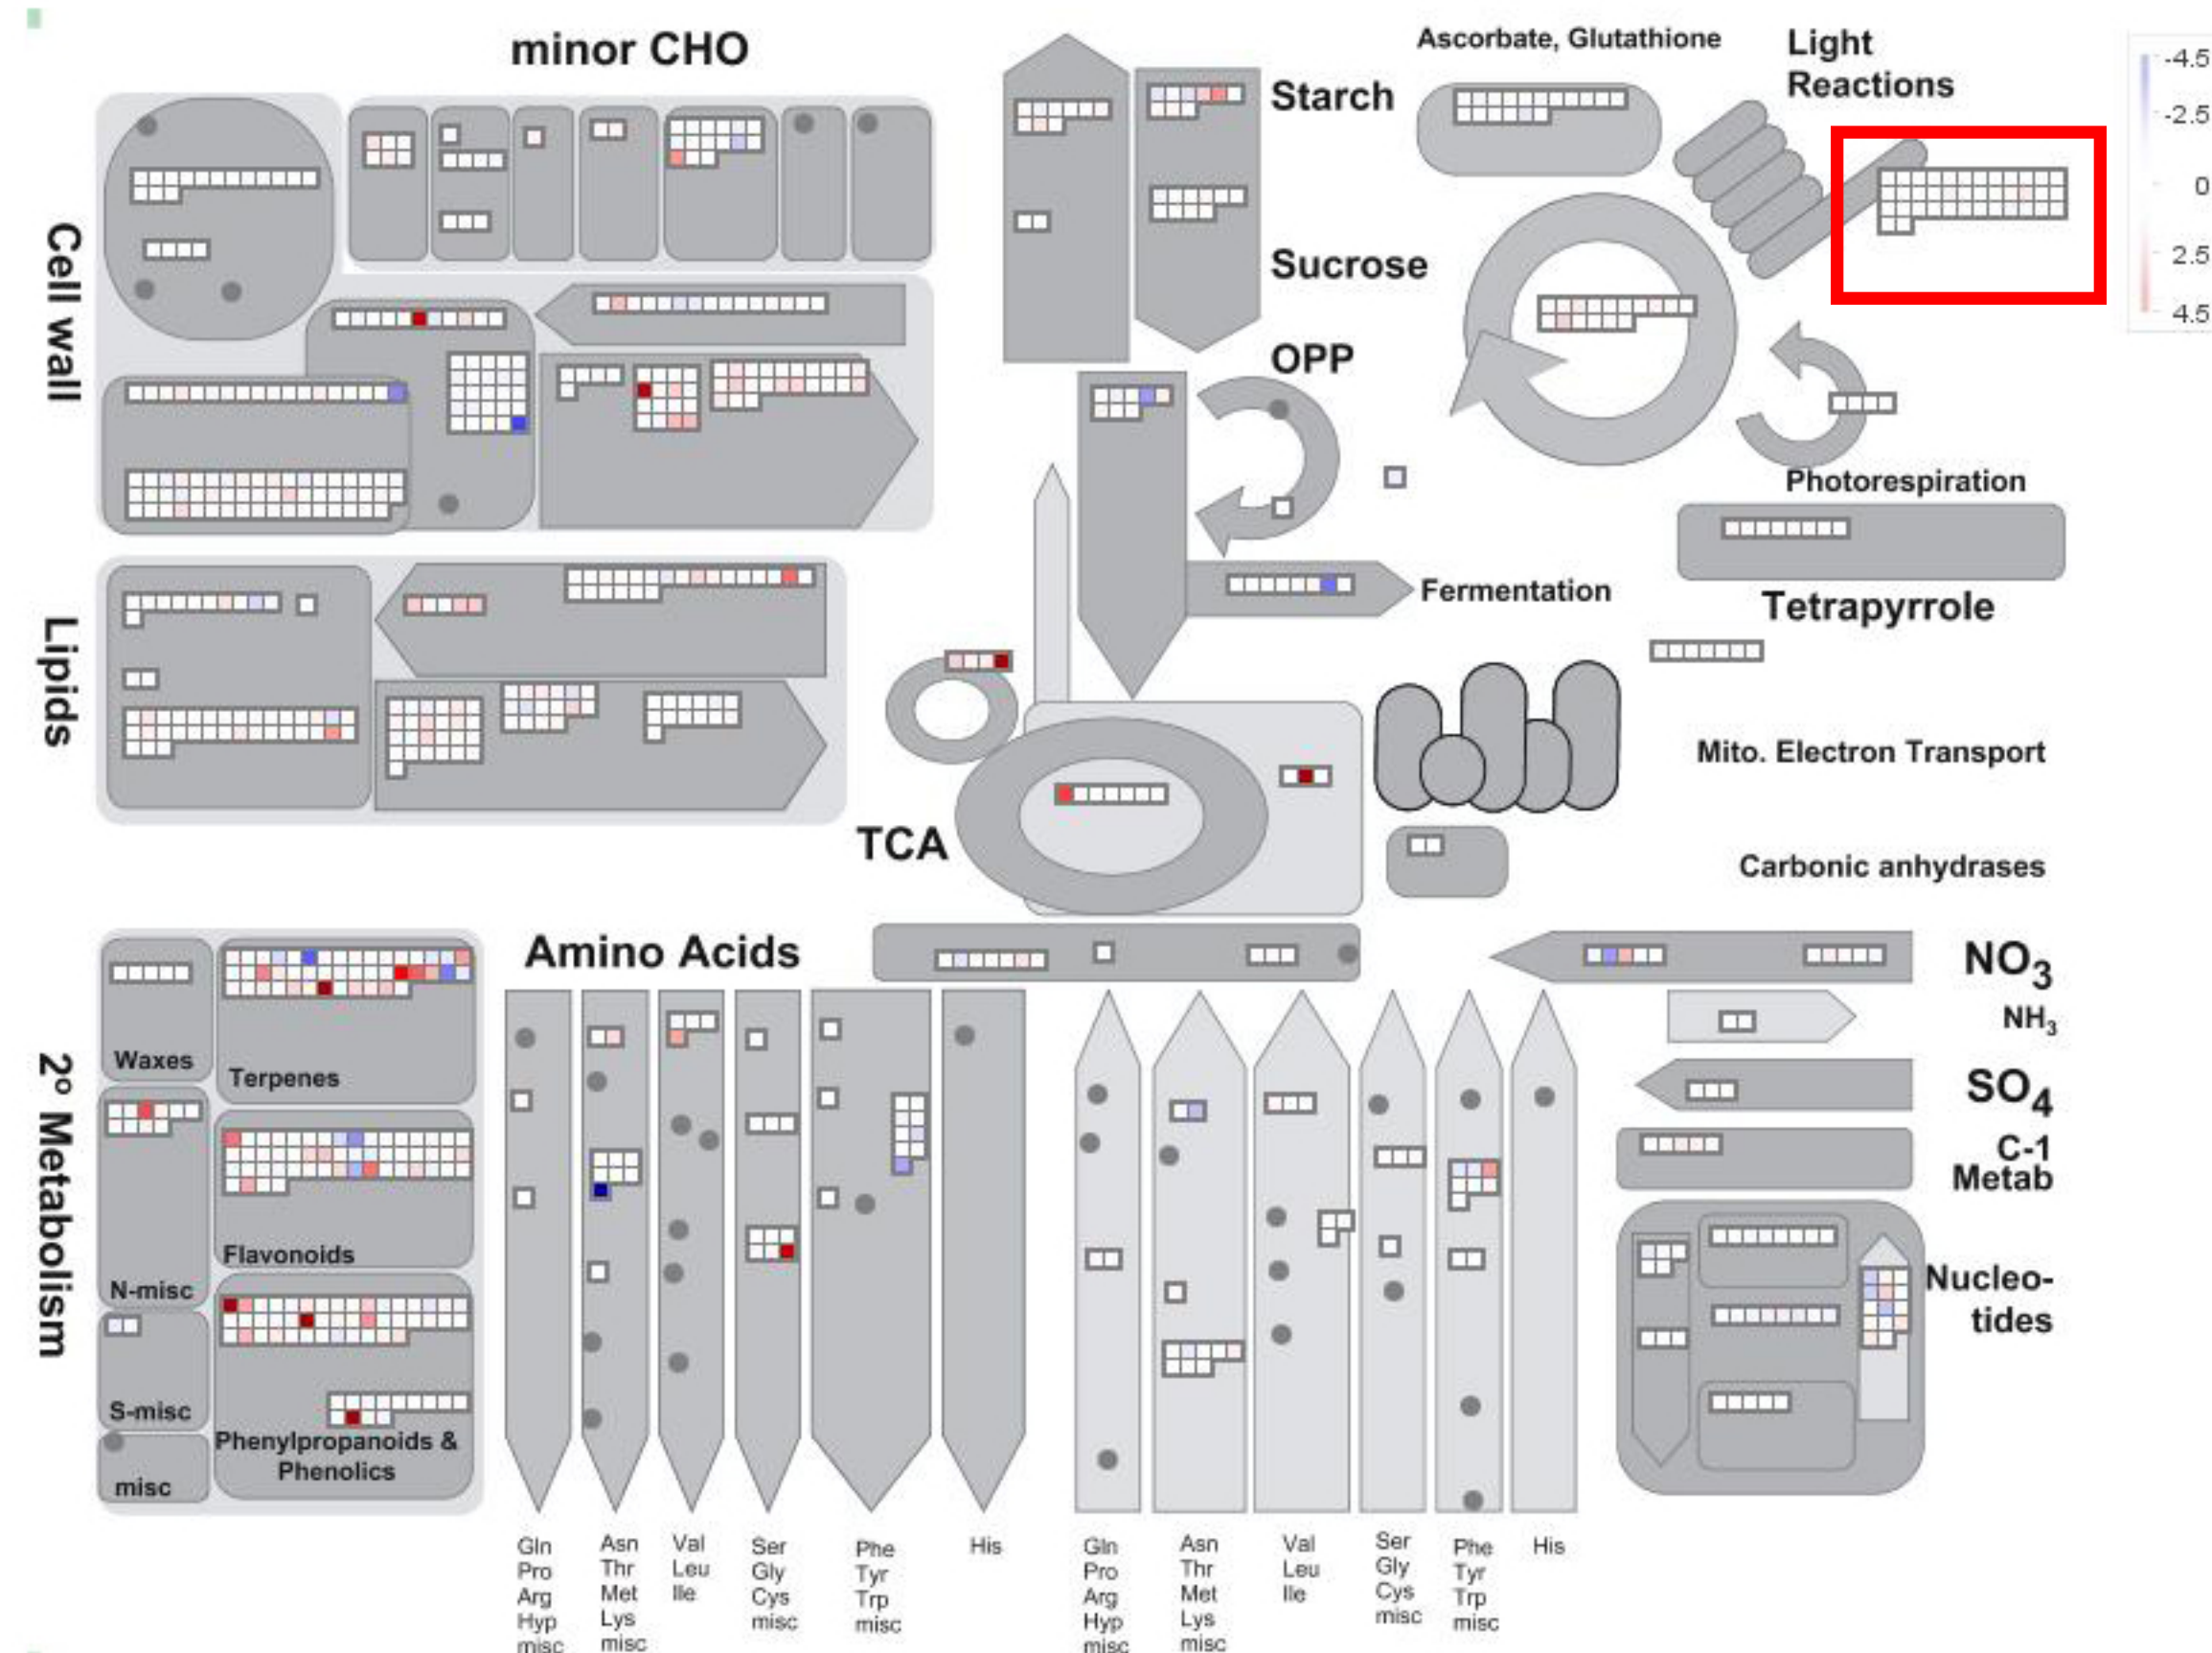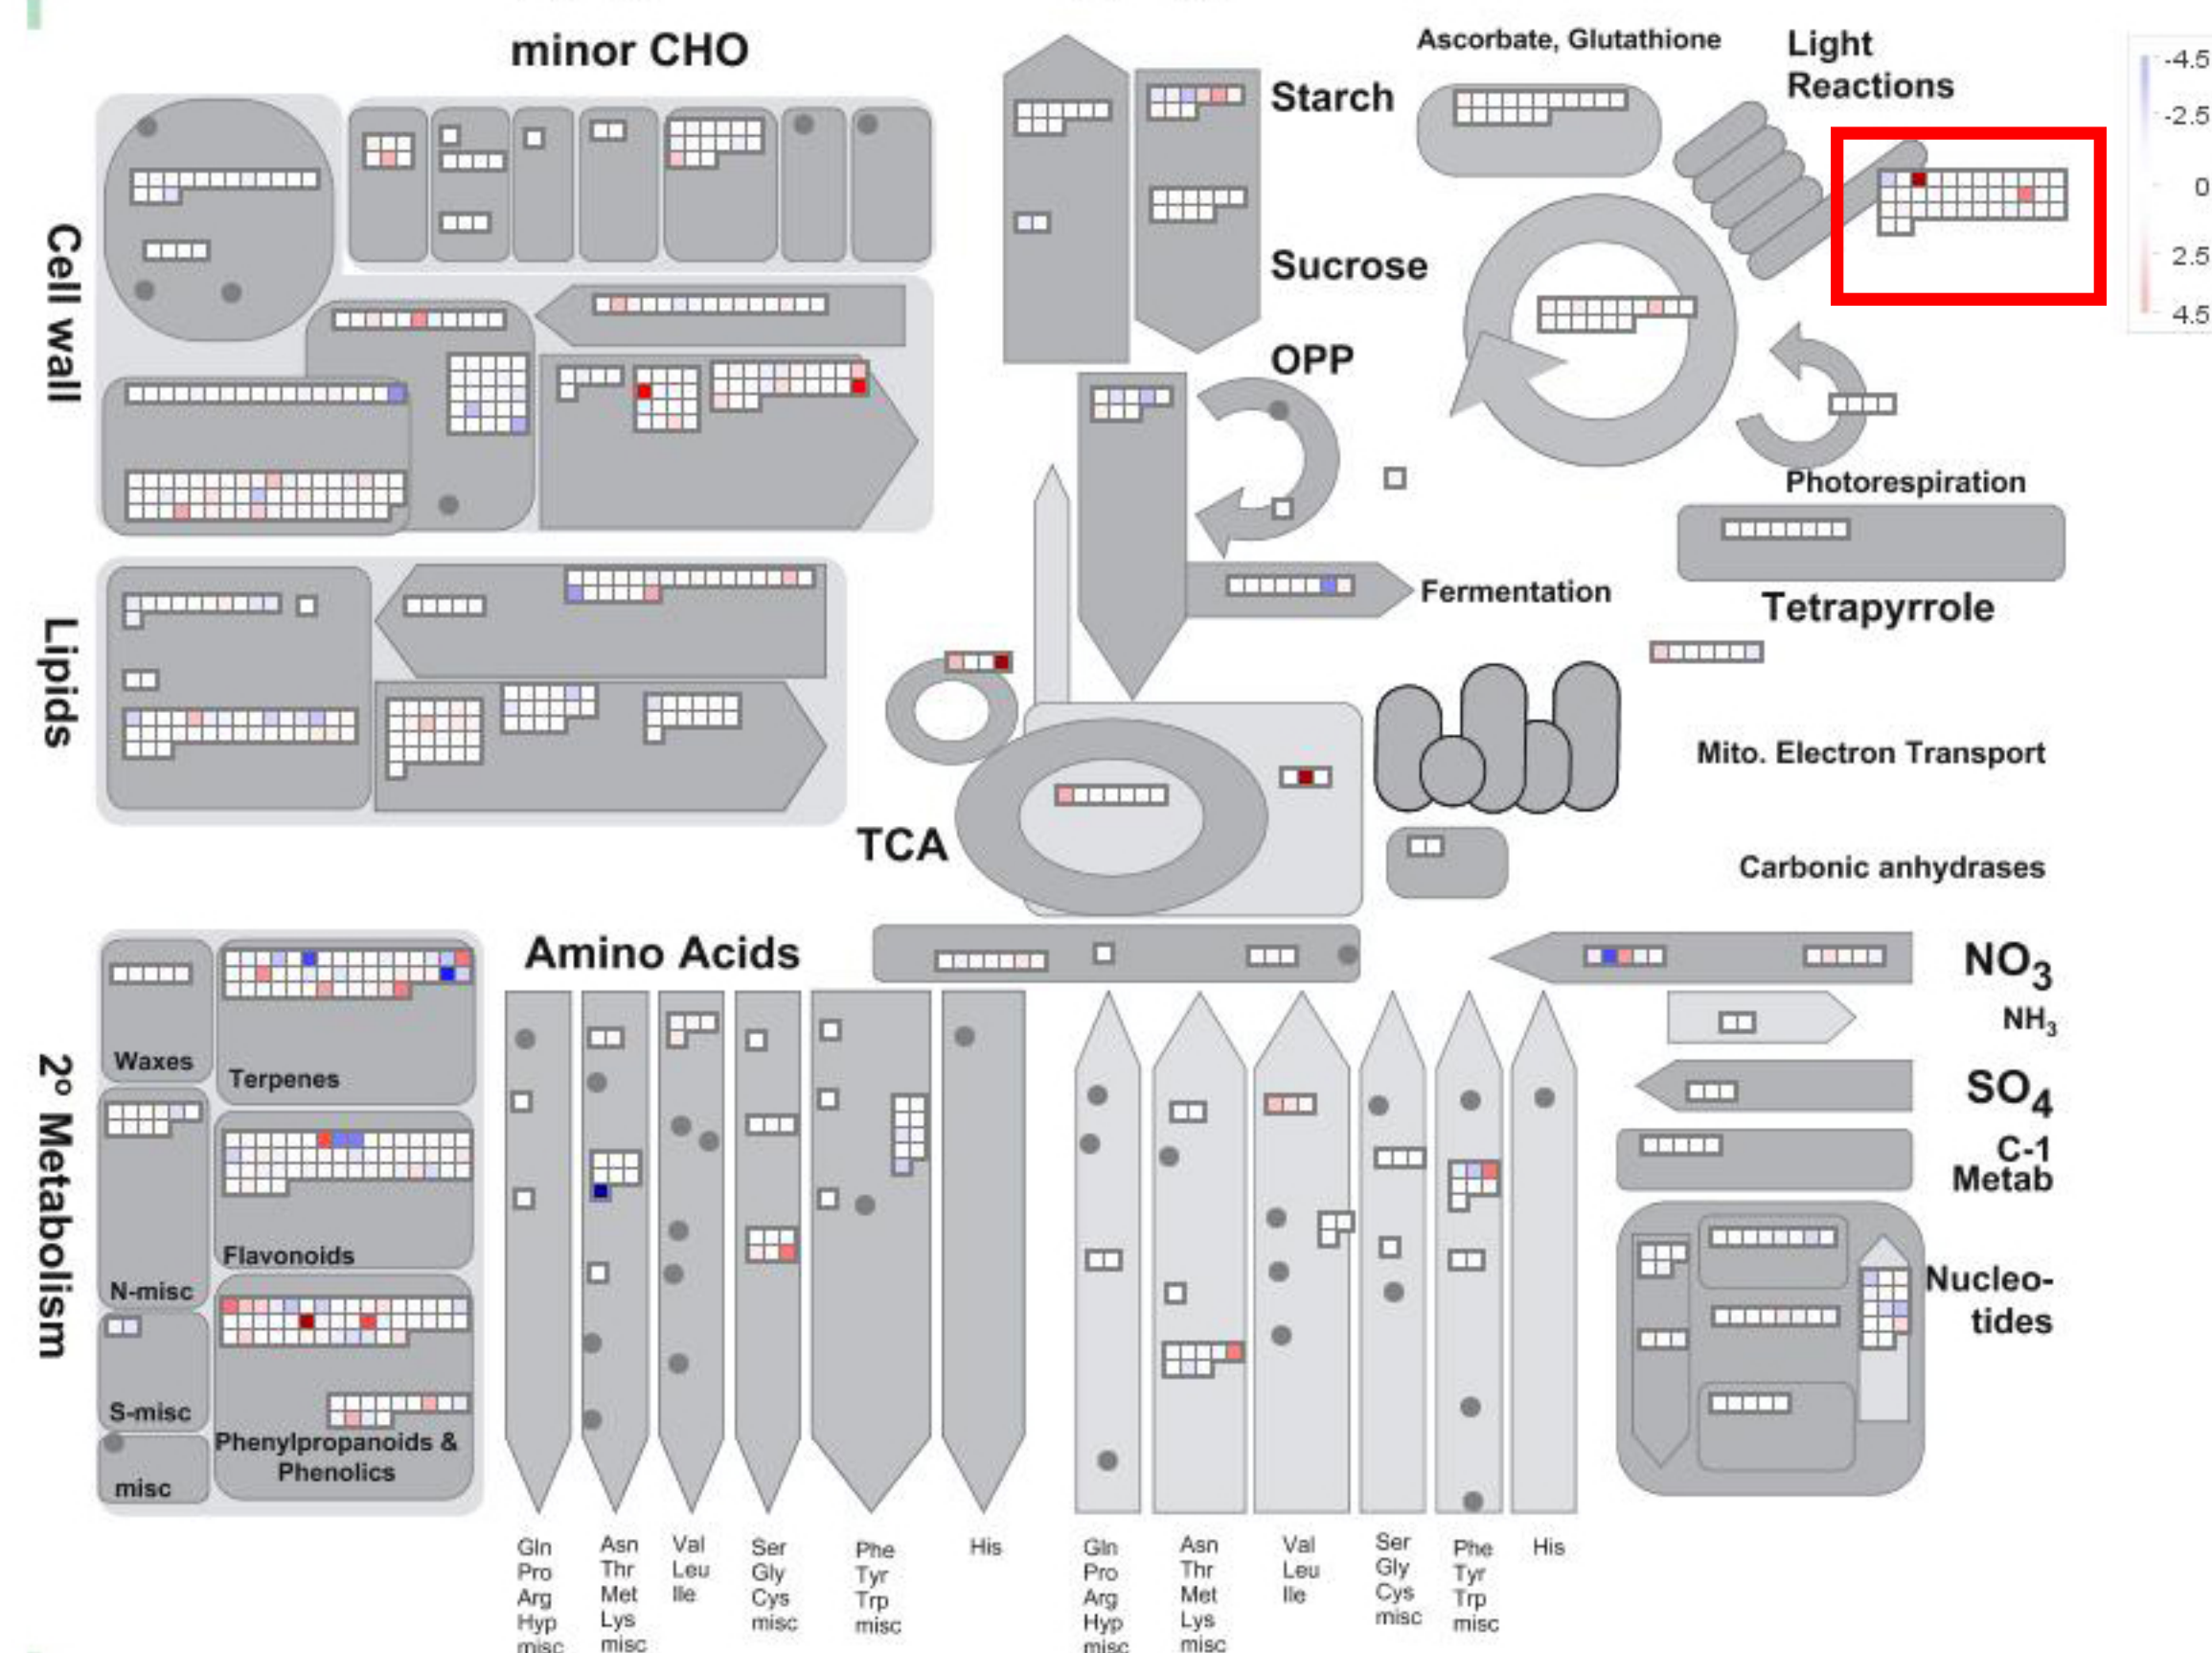

Supplement: s1 [file s1]

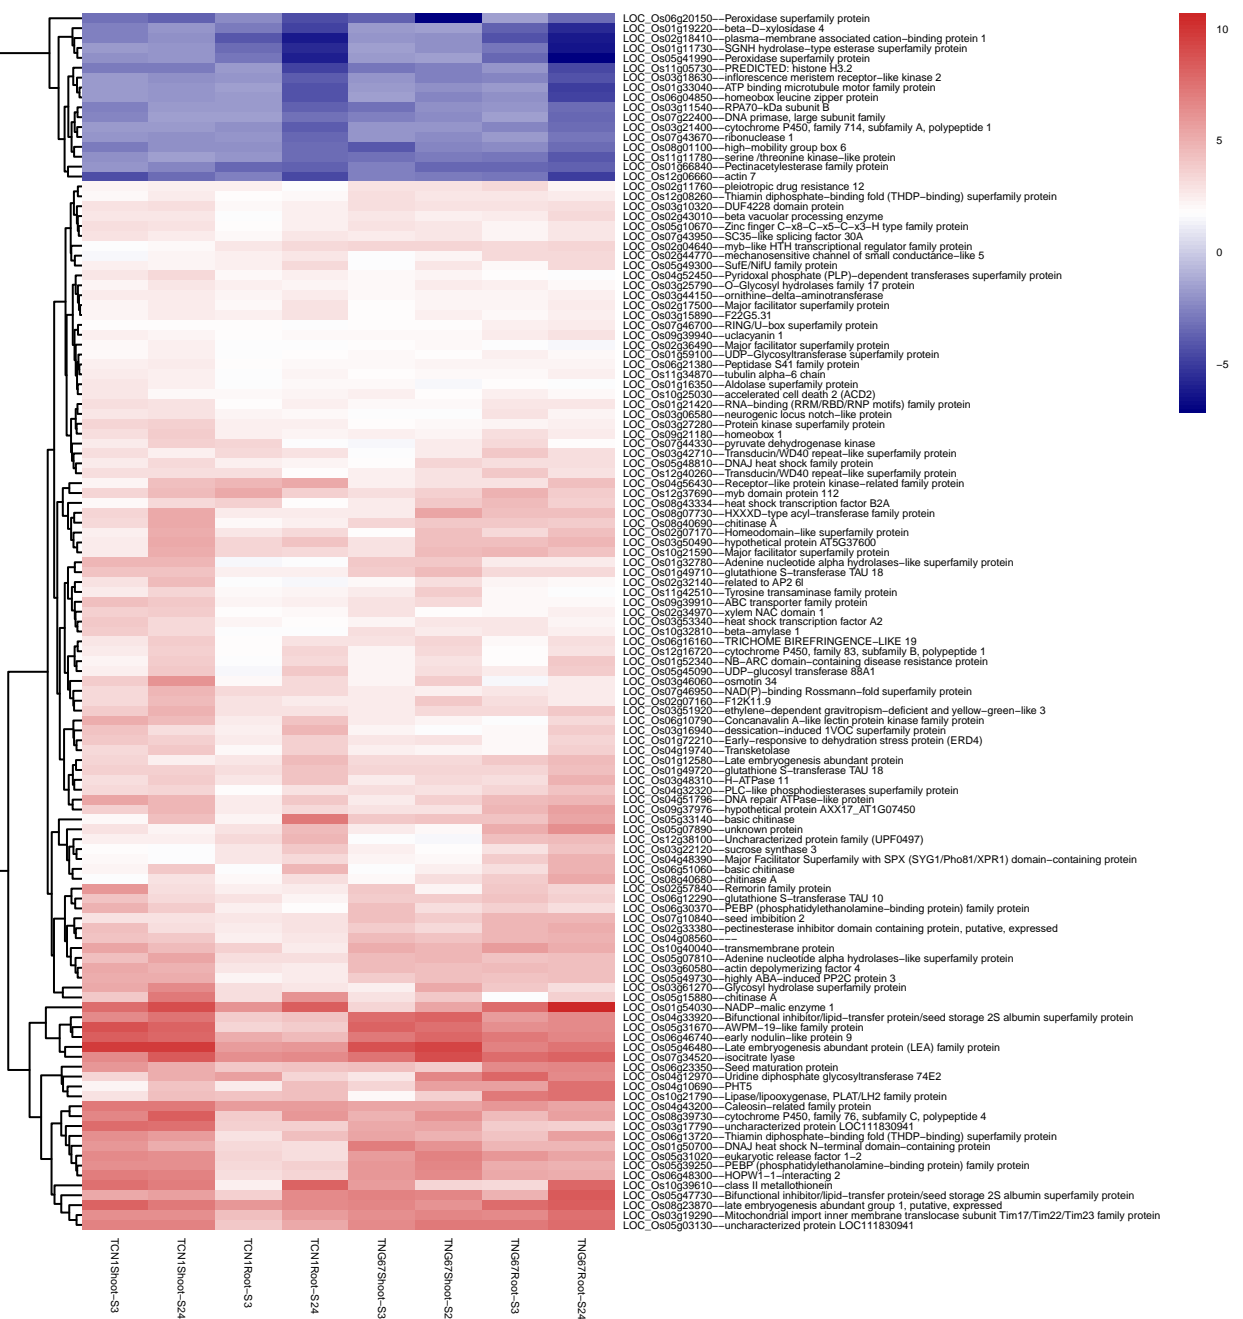

Supplement: s1 [file s1]

TCN1

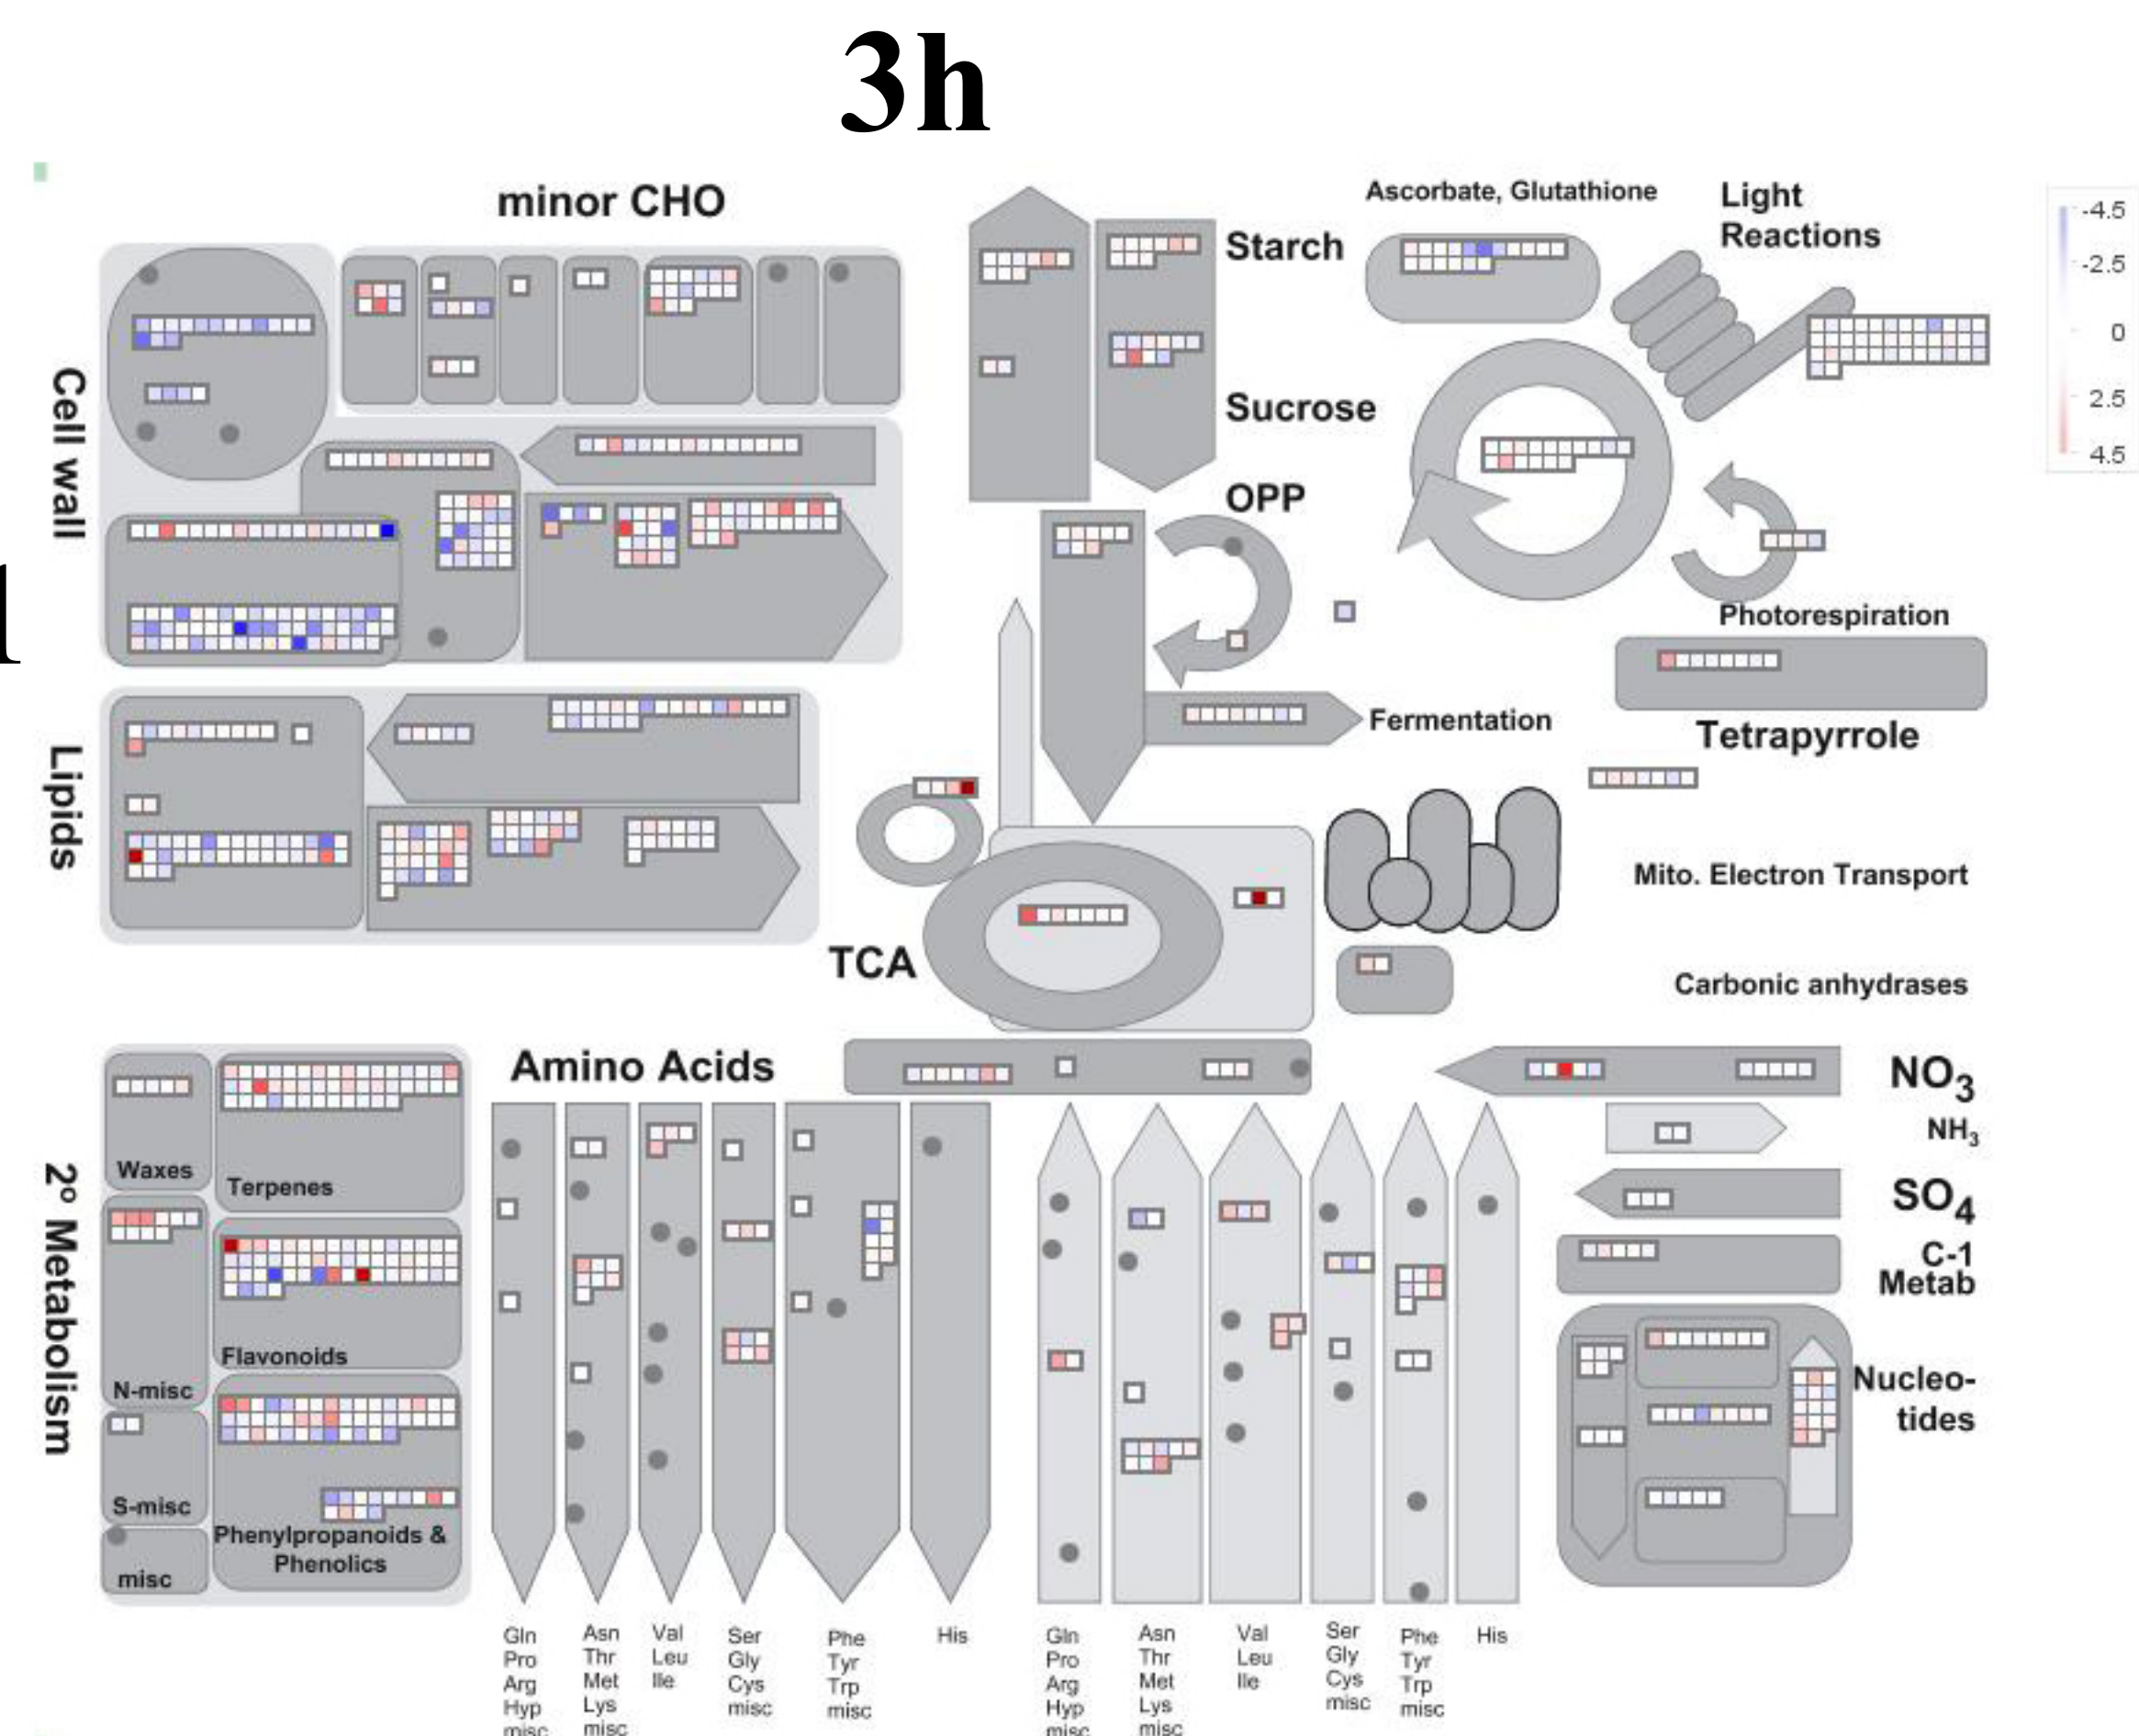

24h

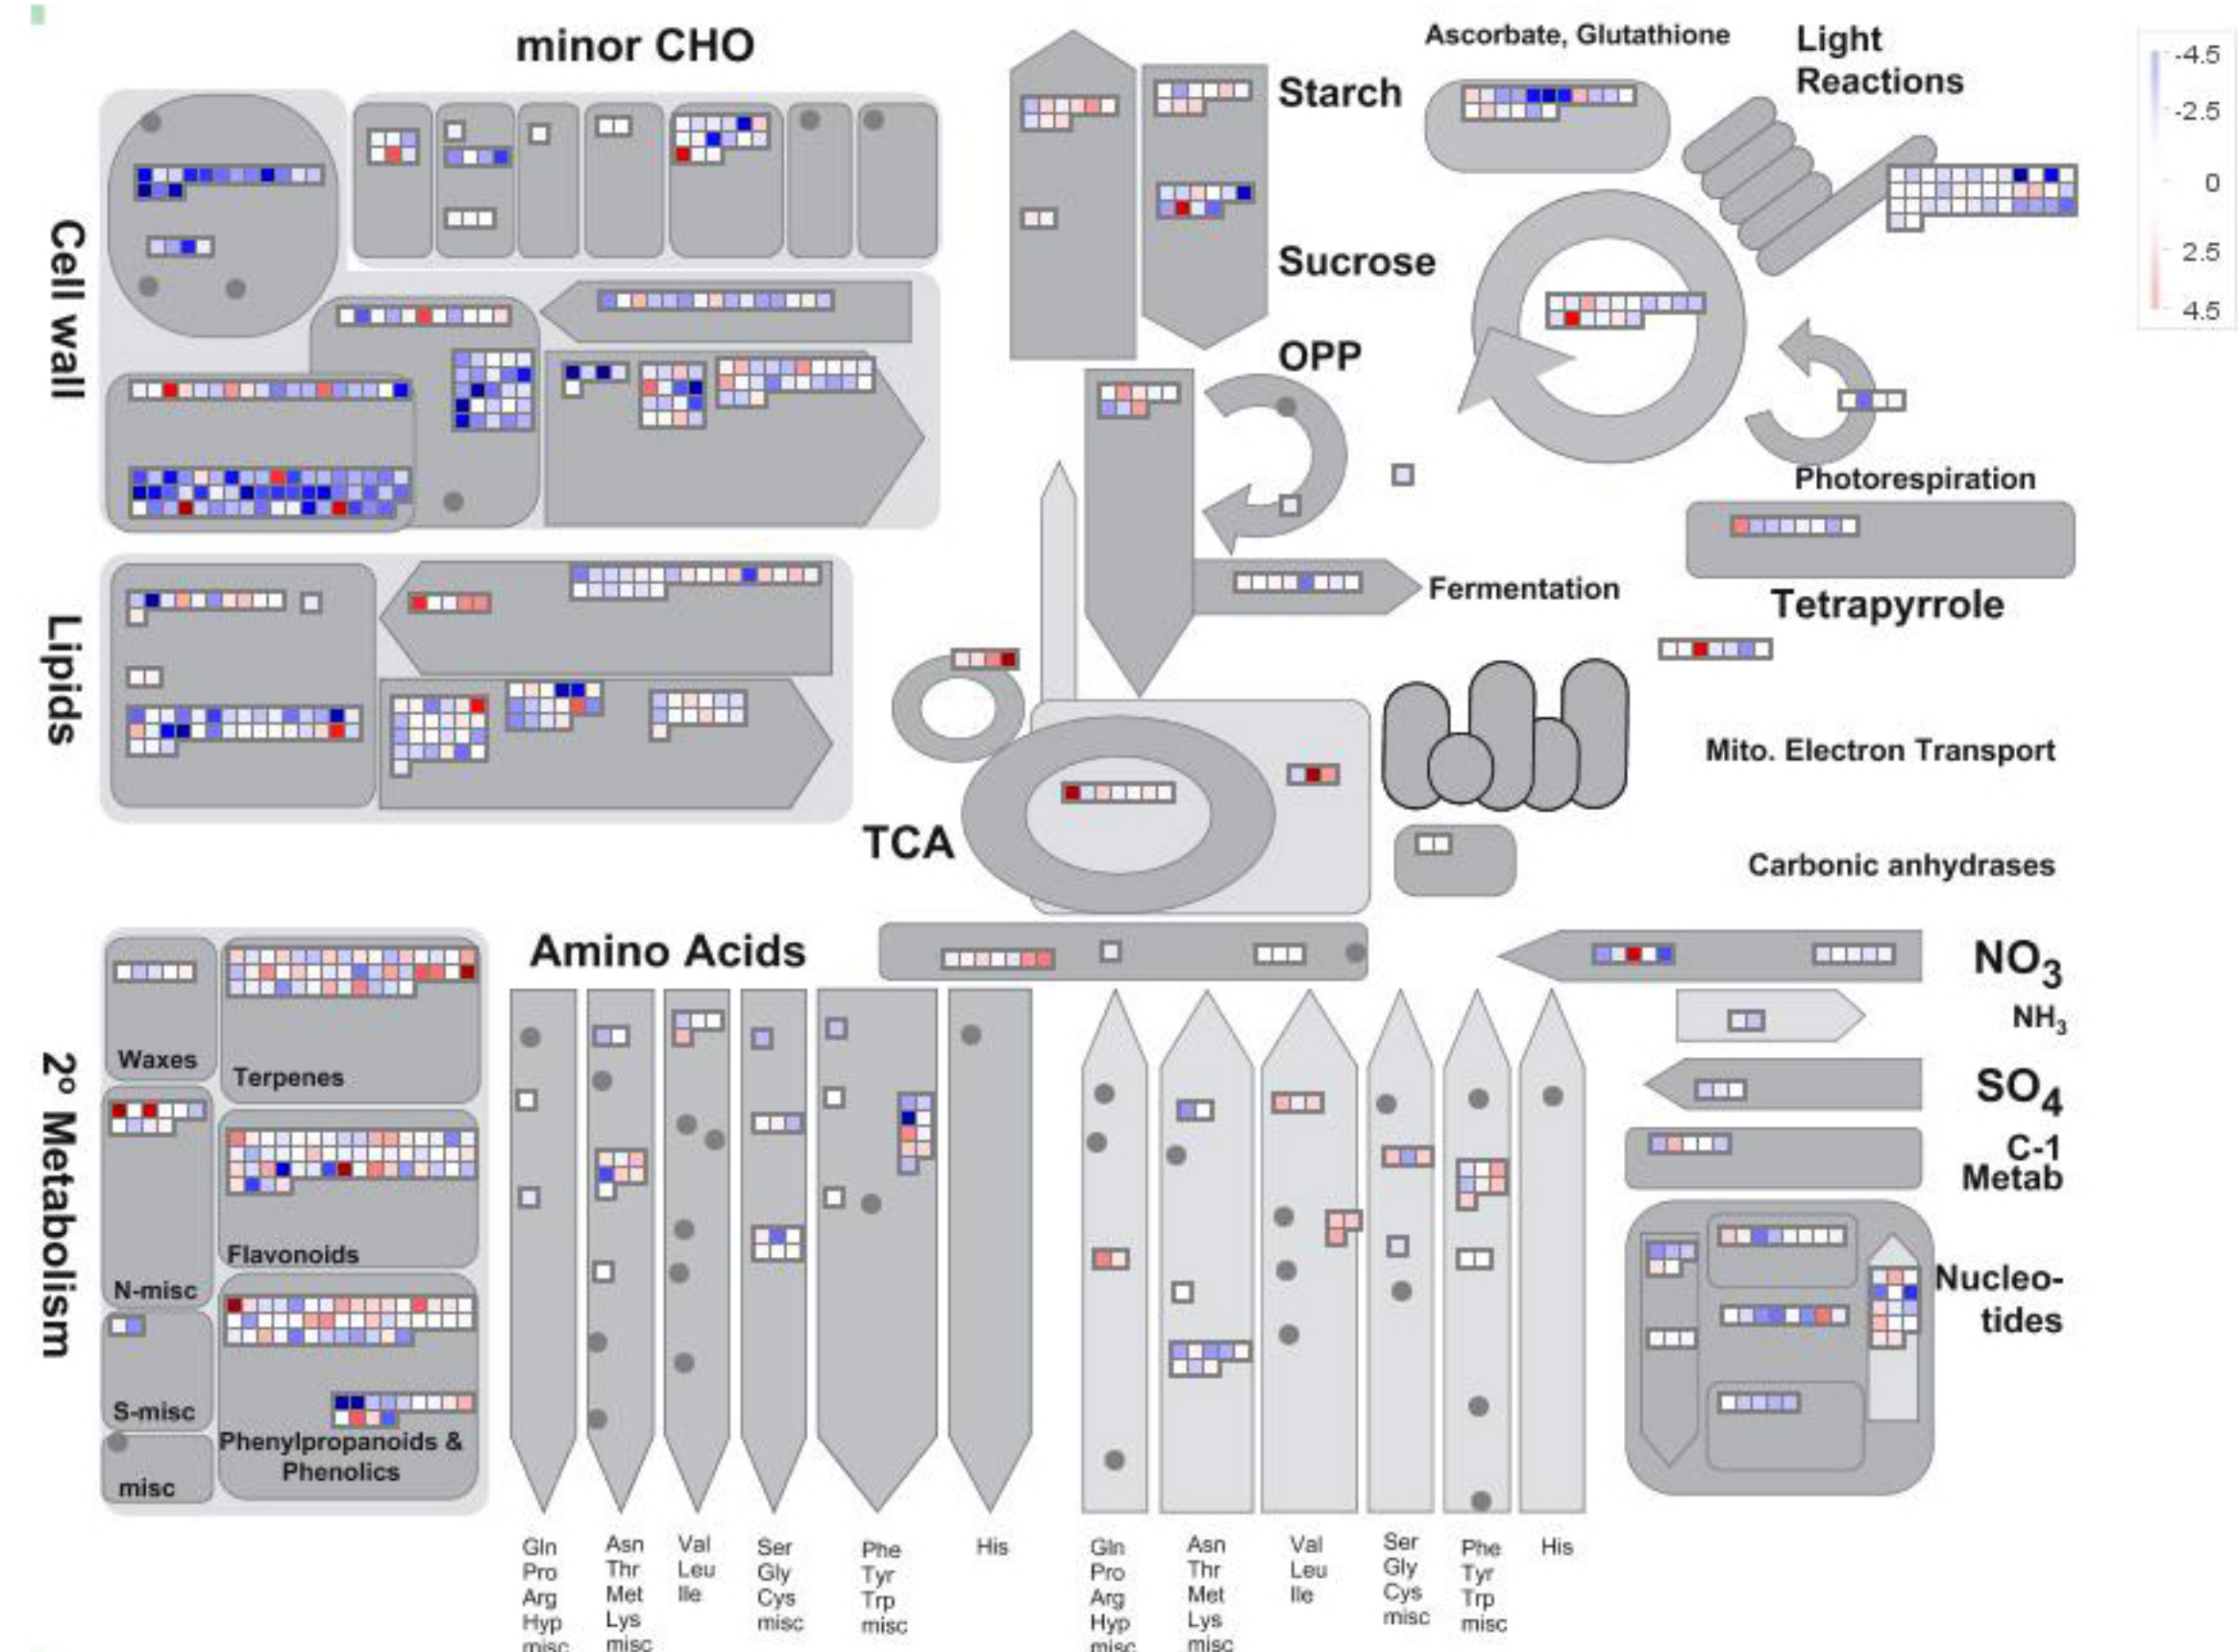

Re24h

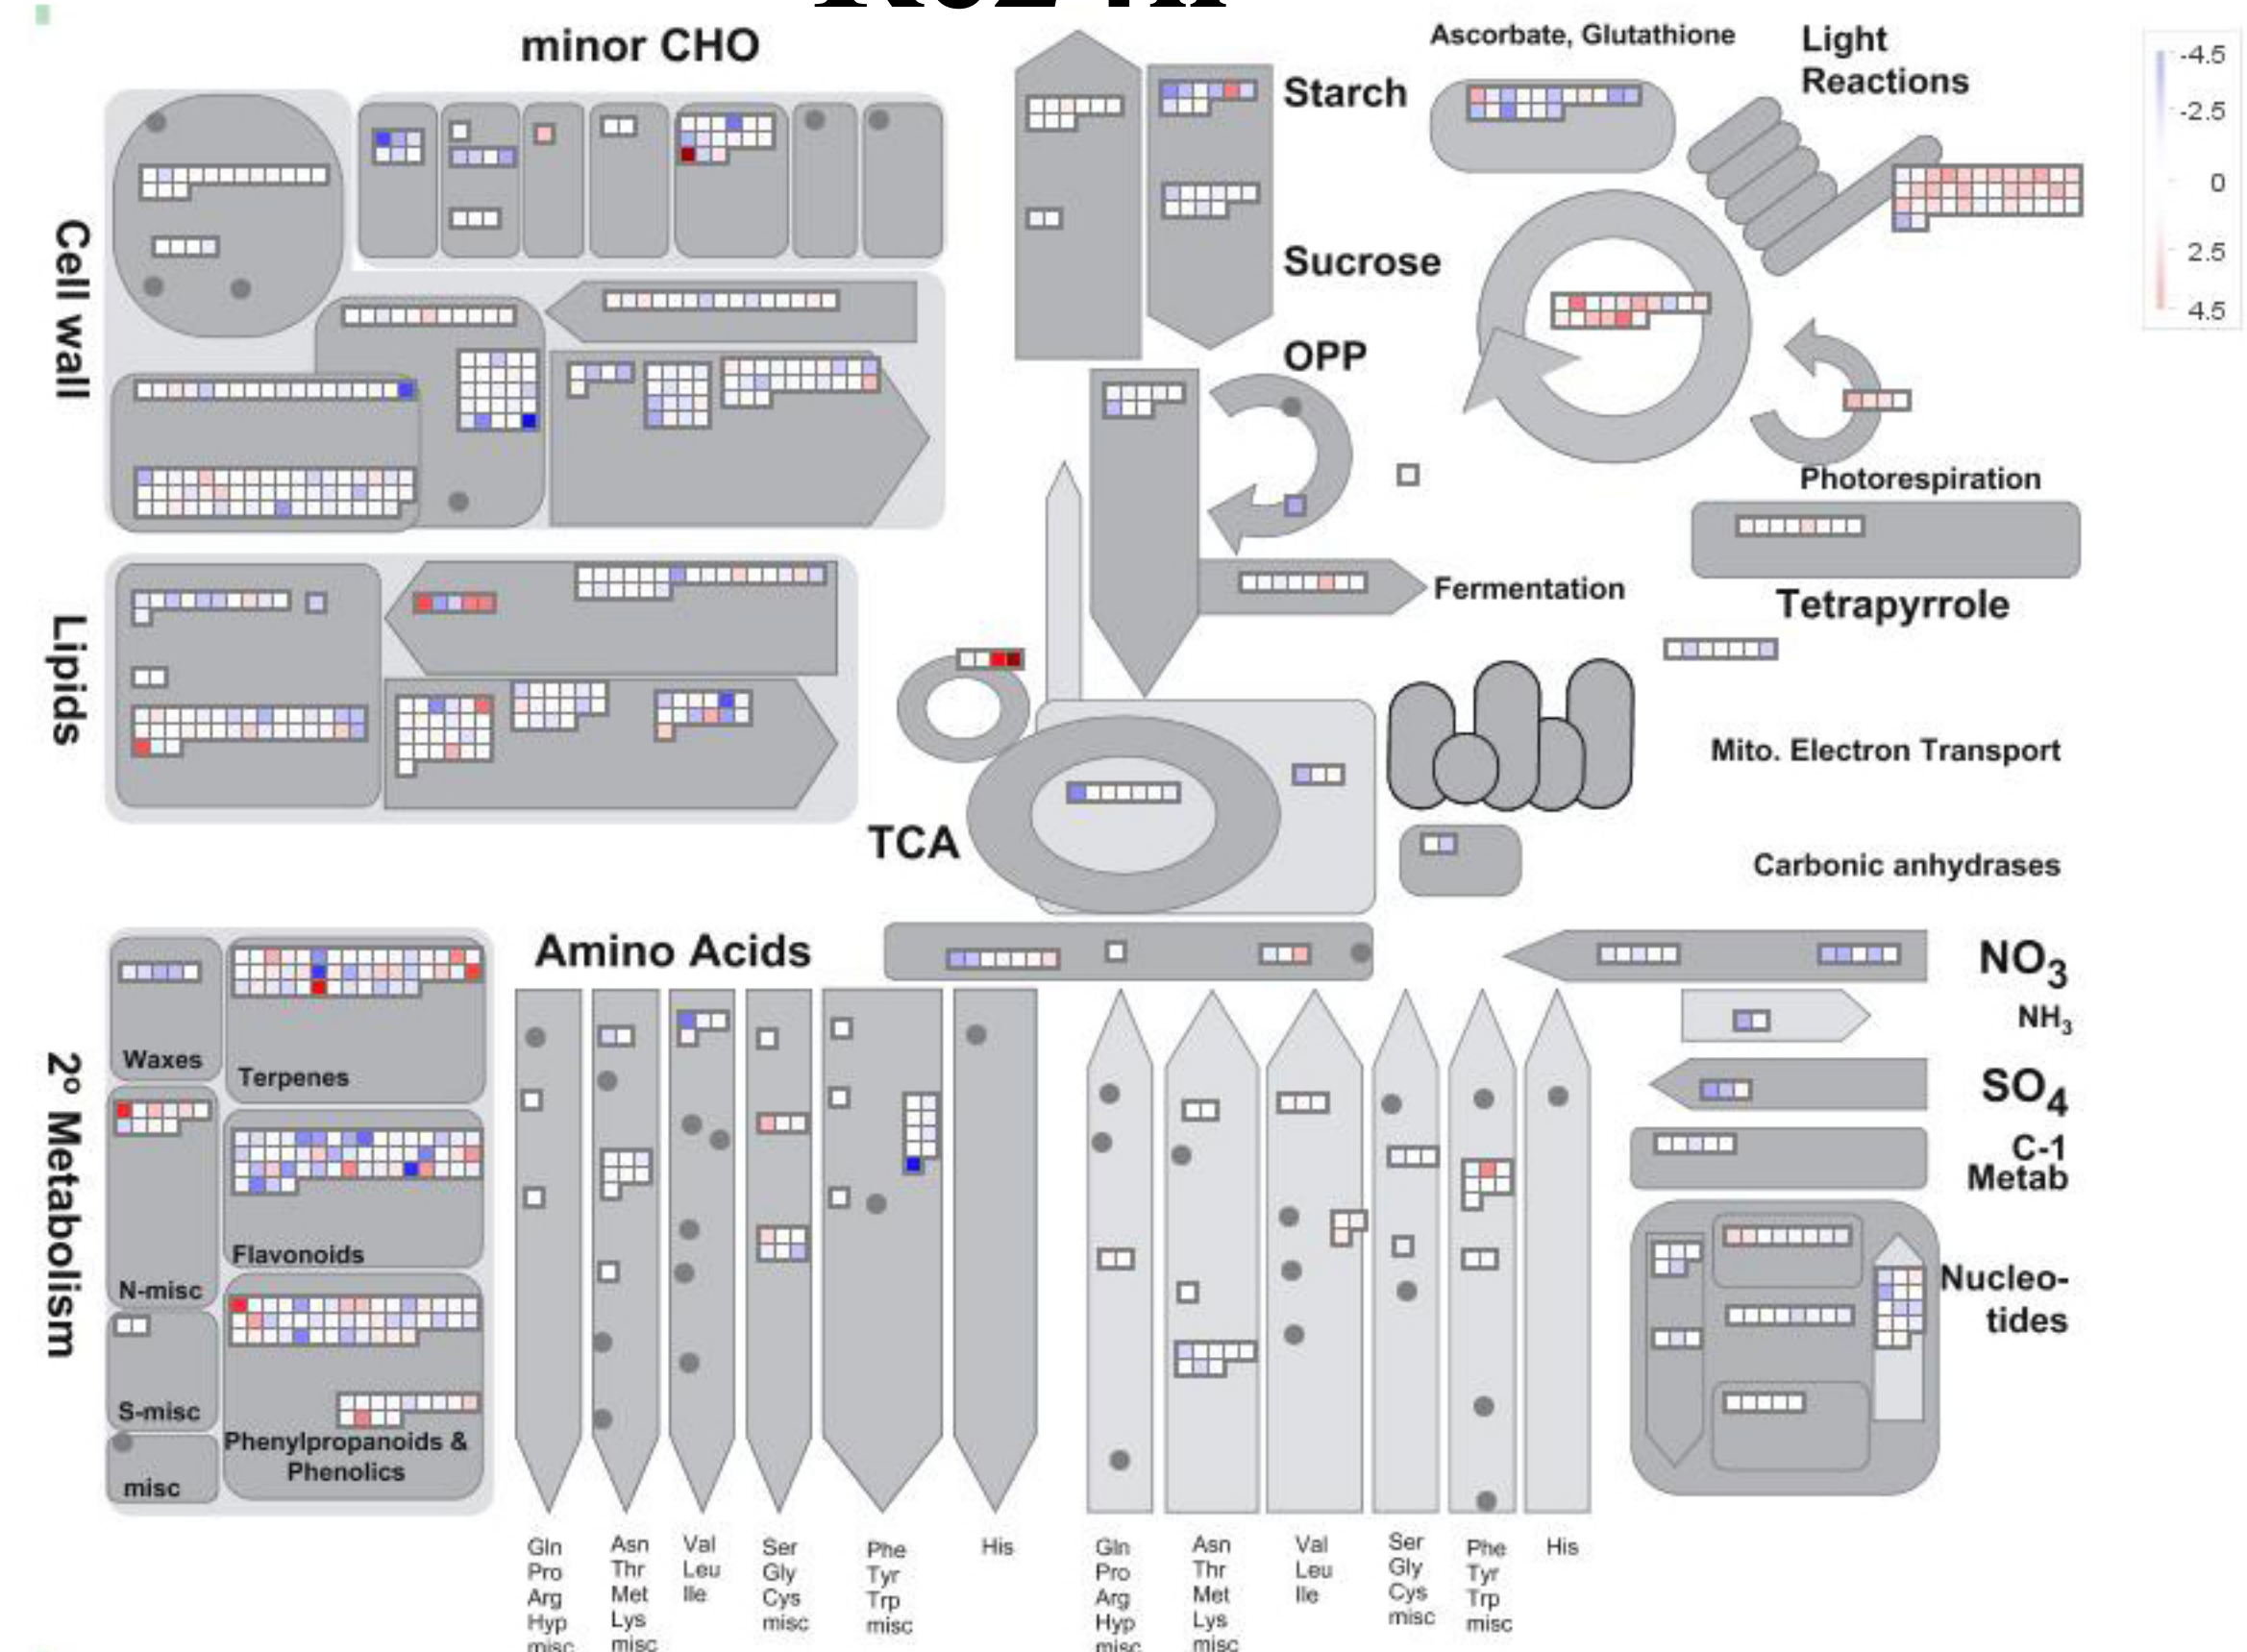

TNG67

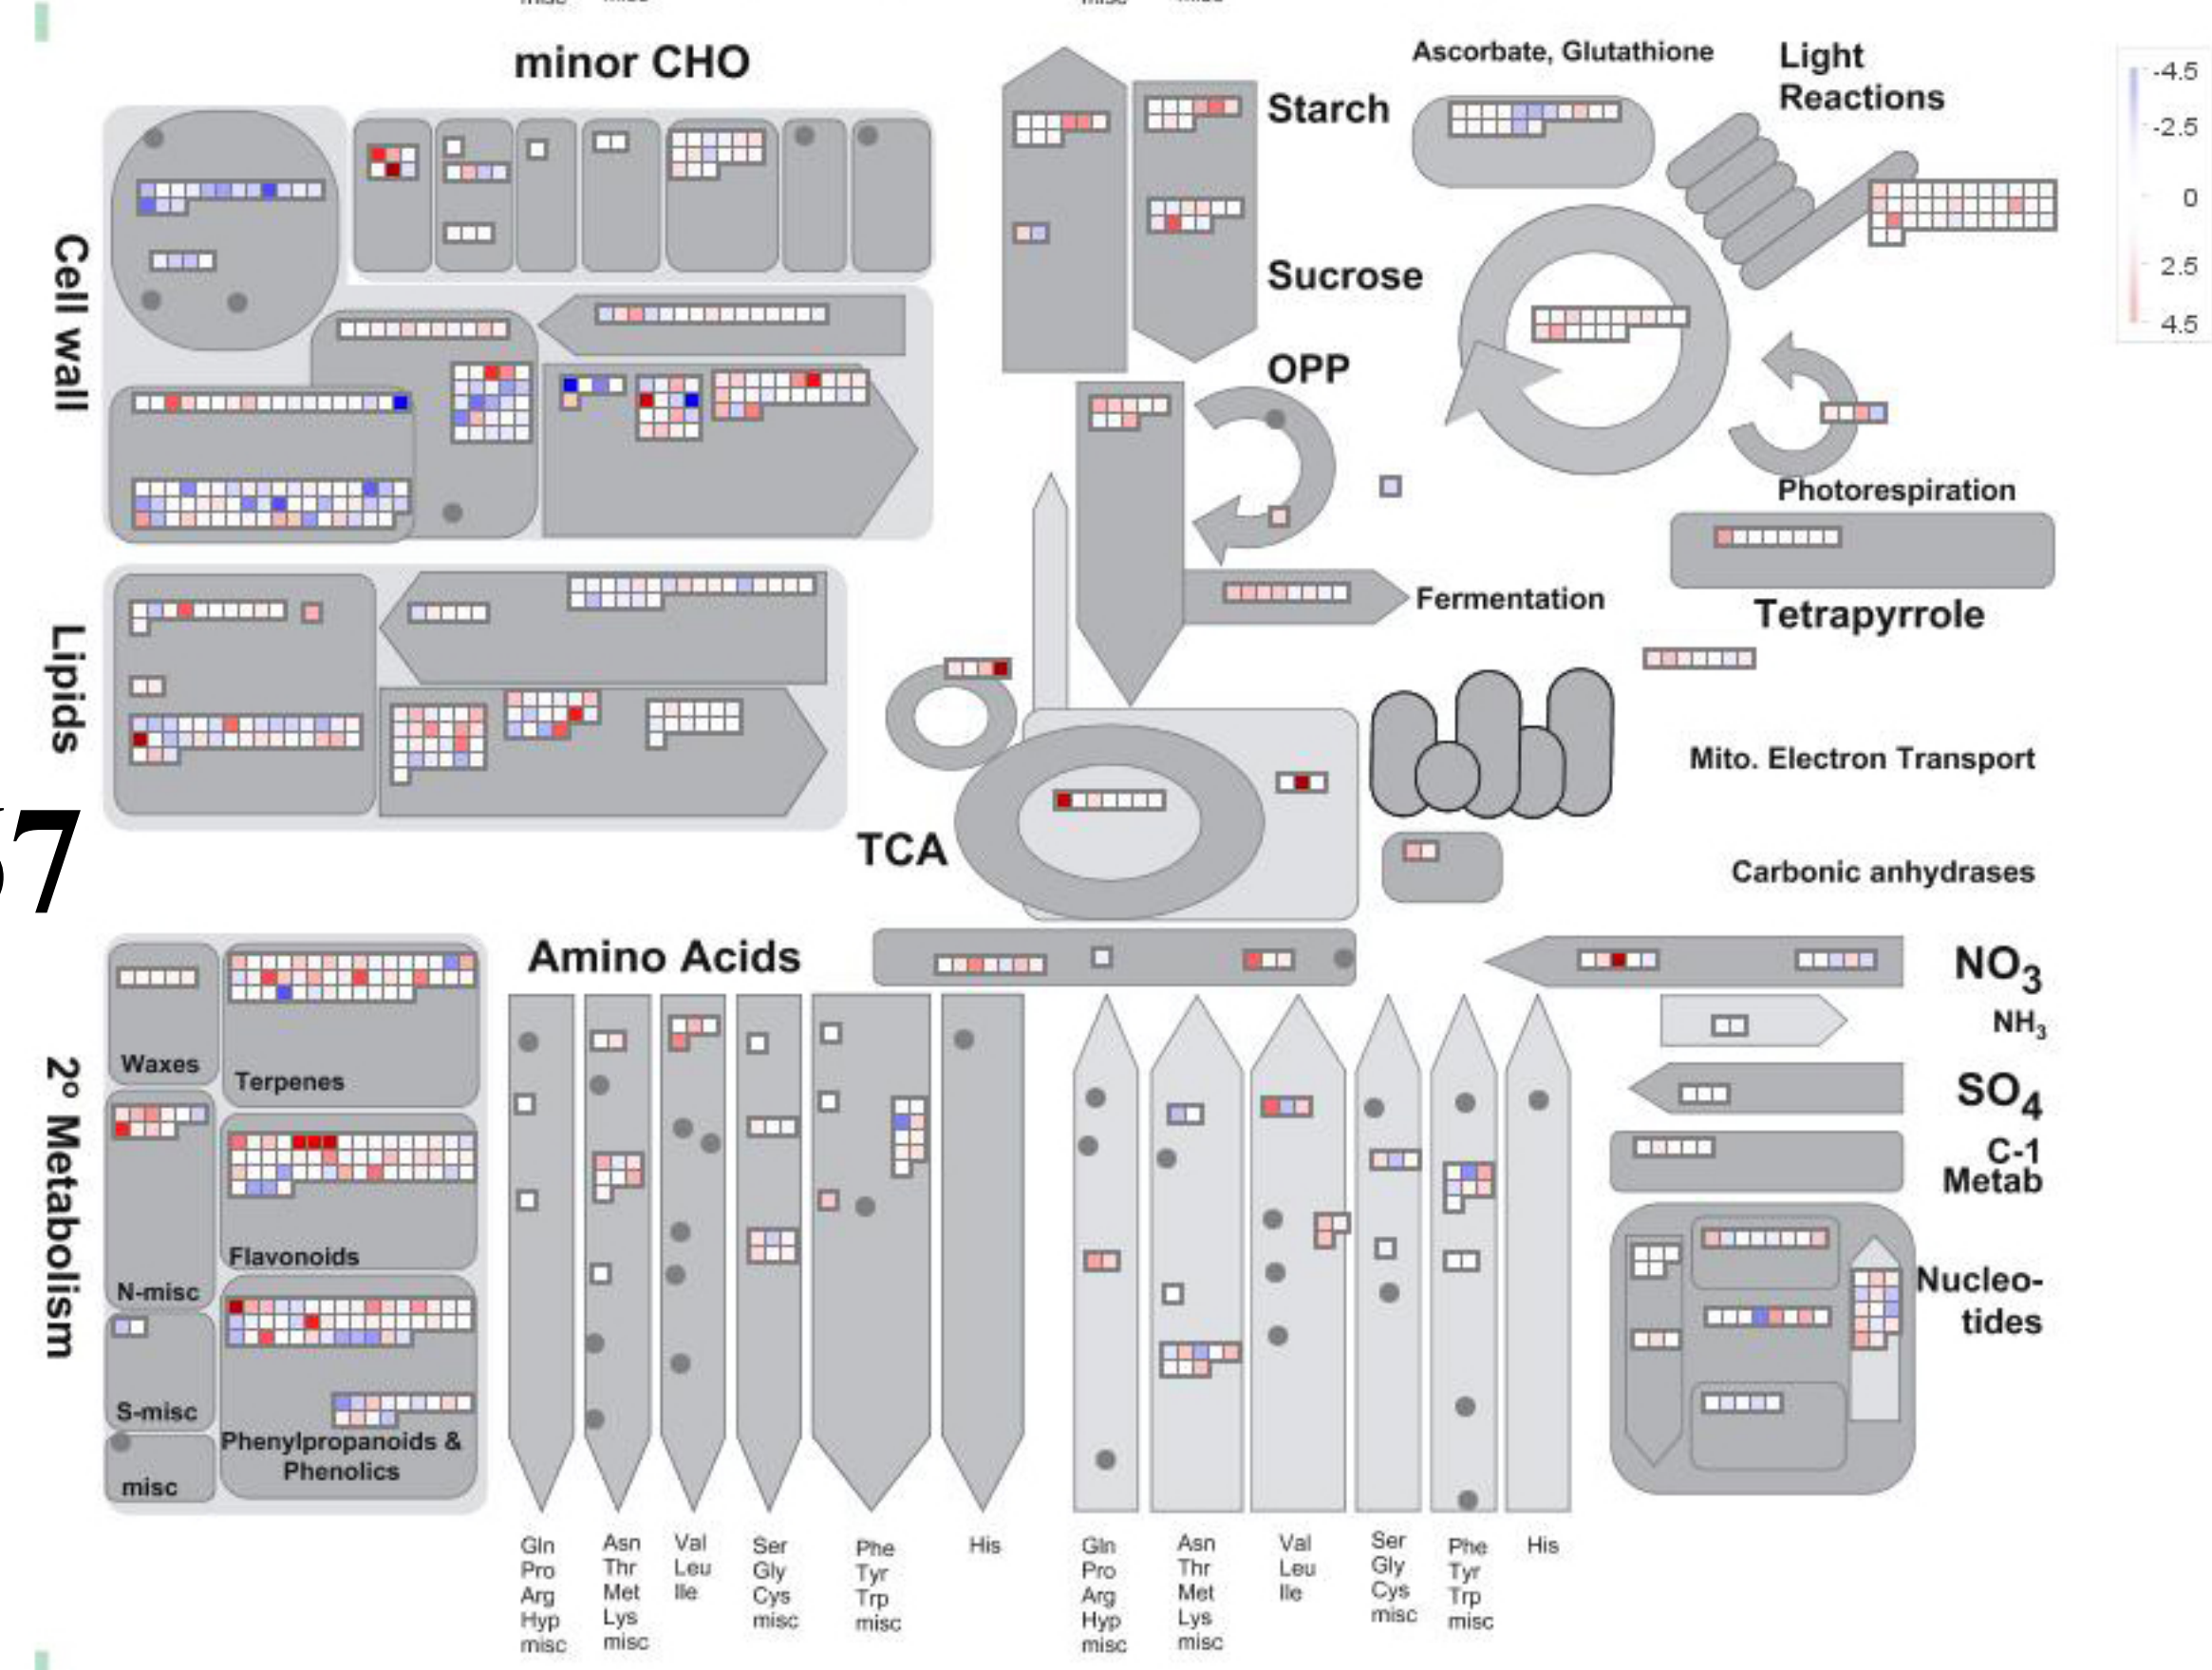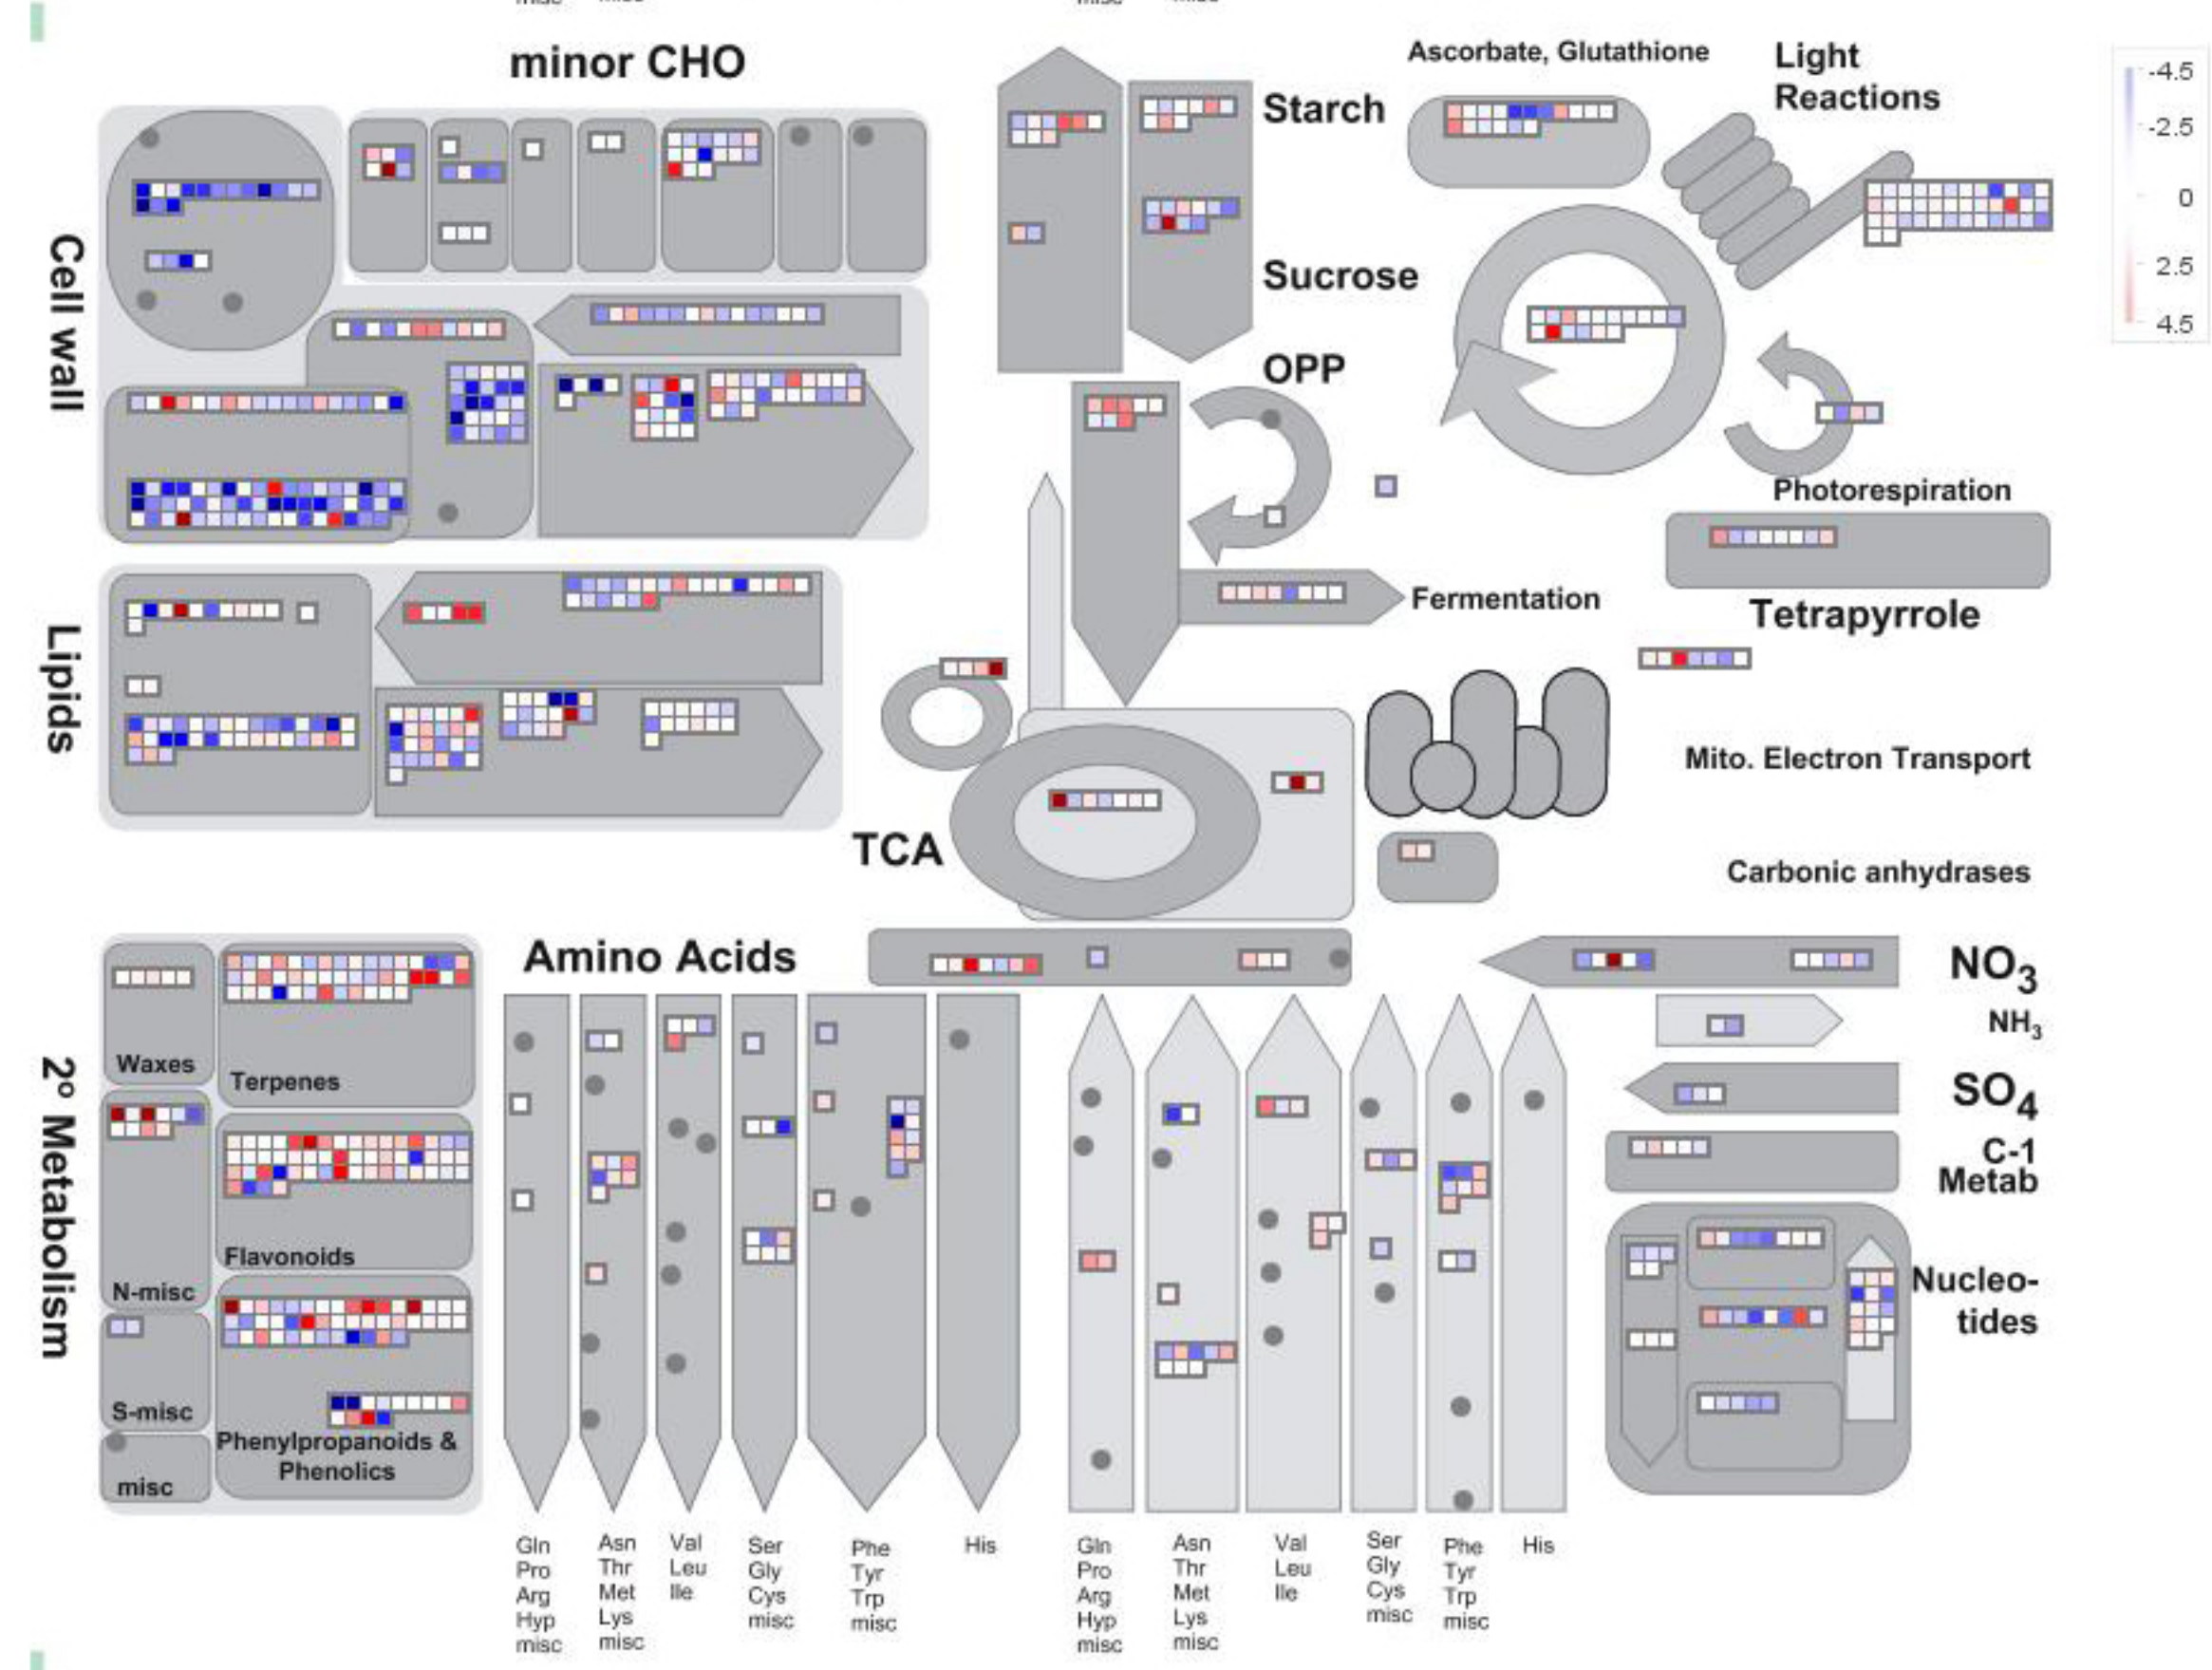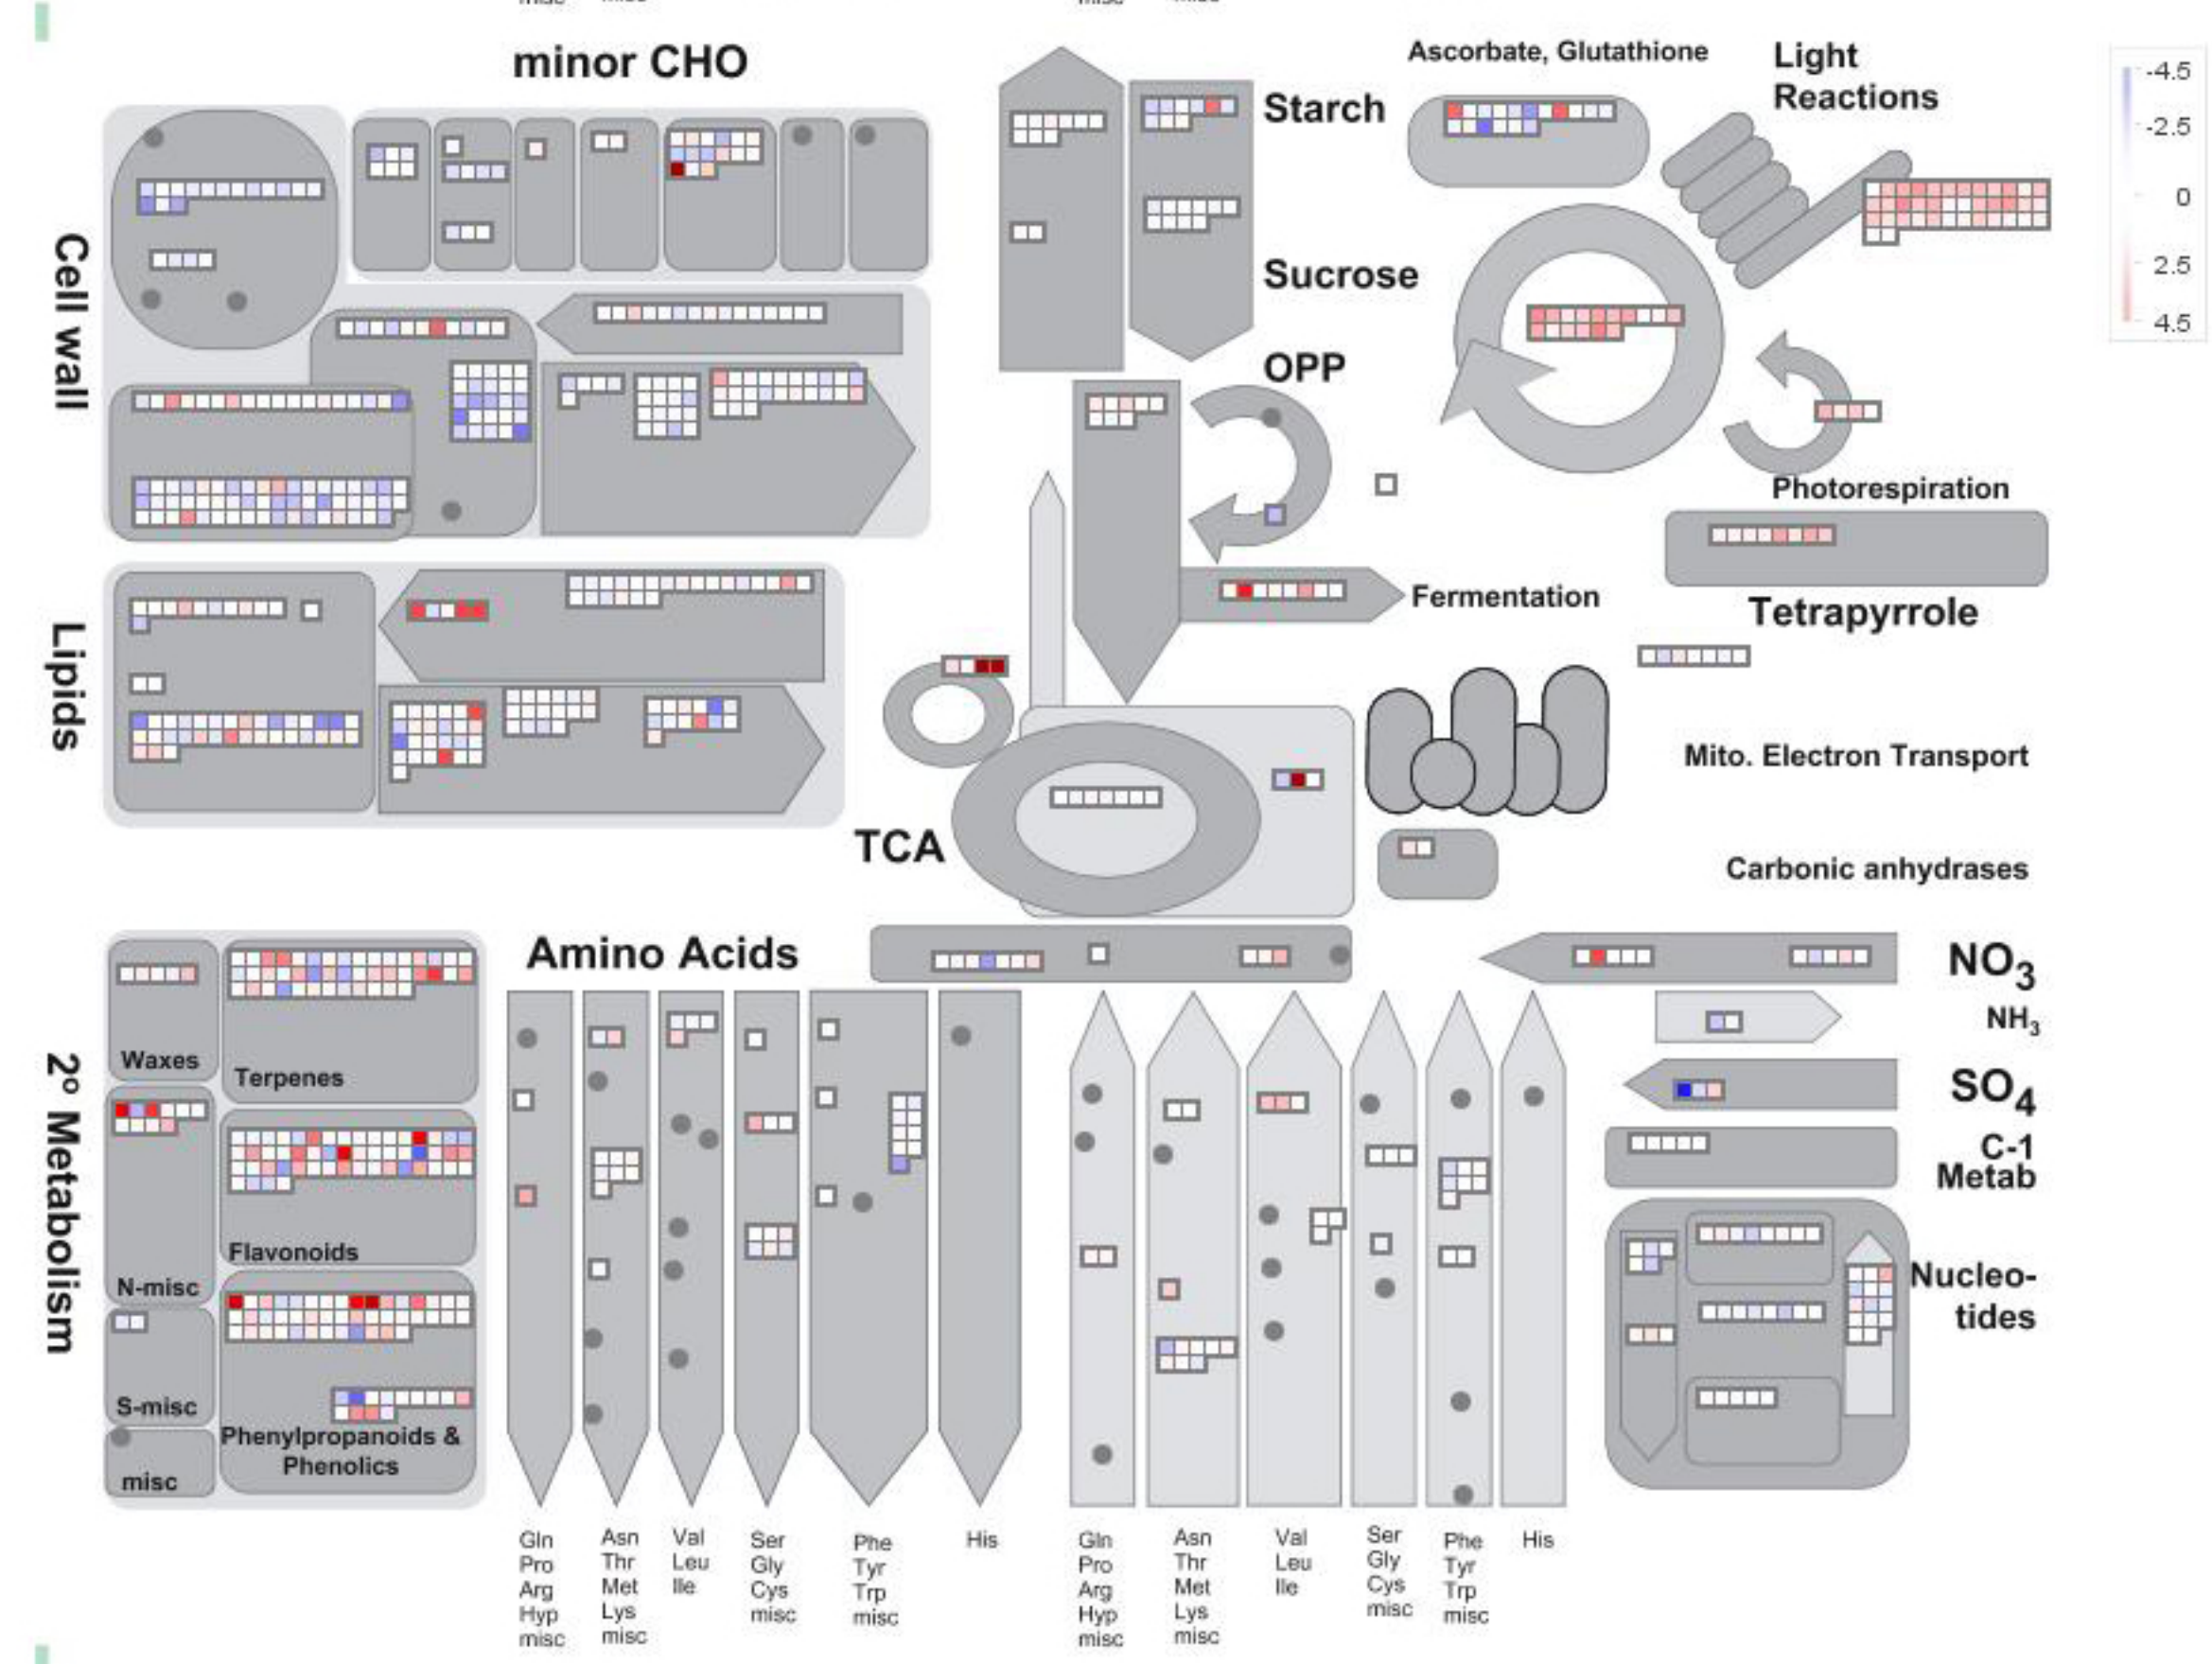

Supplement: s1 [file s1]

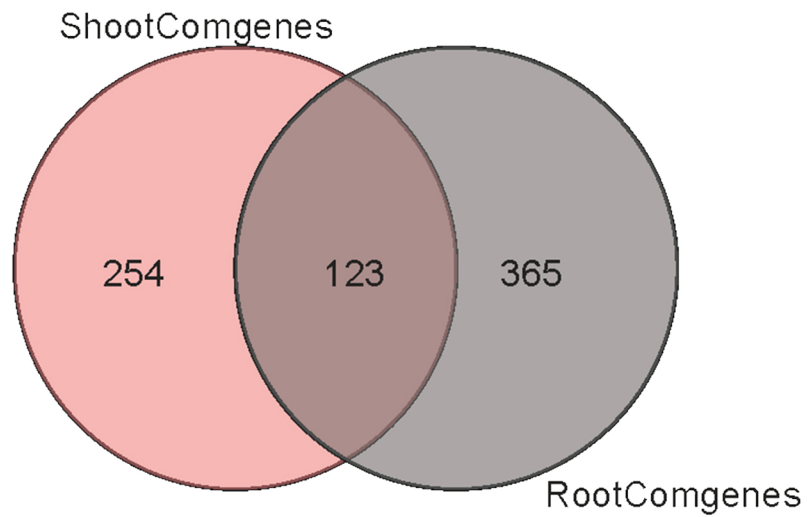

Supplement: s1 [file s1]

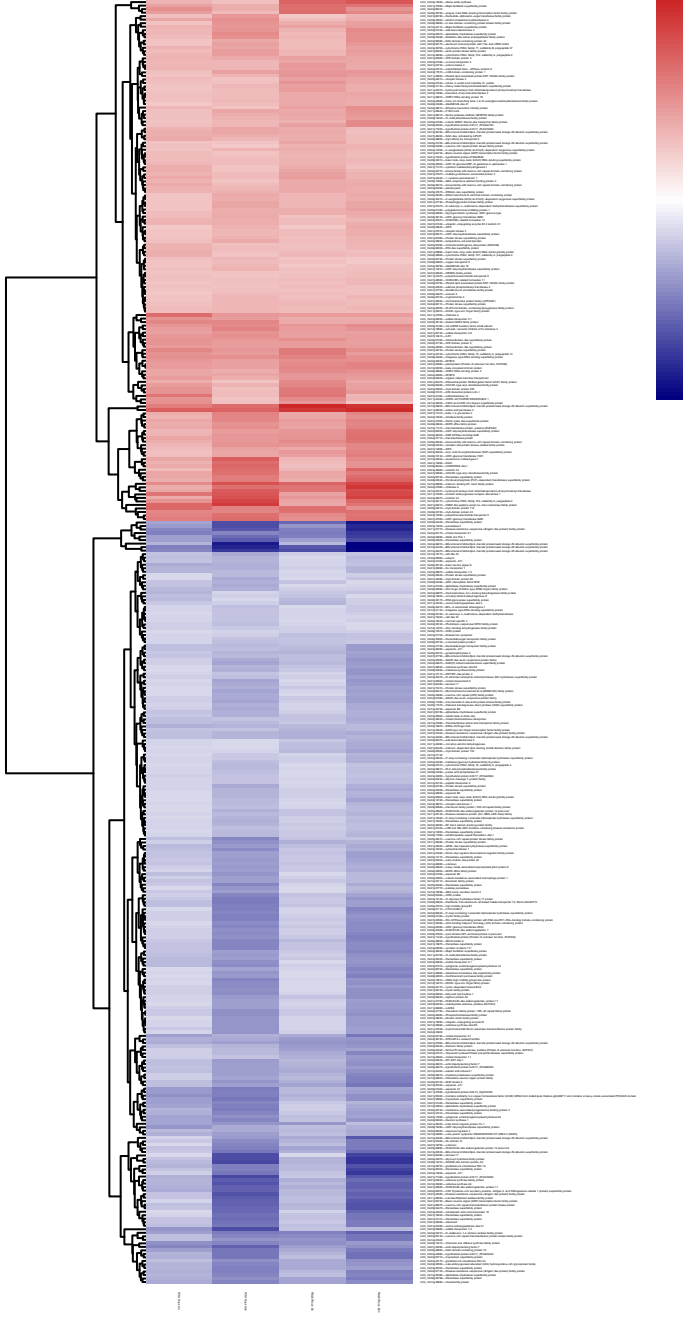

1000000

1000000

1000000

1000000

Supplement: s1 [file s1]

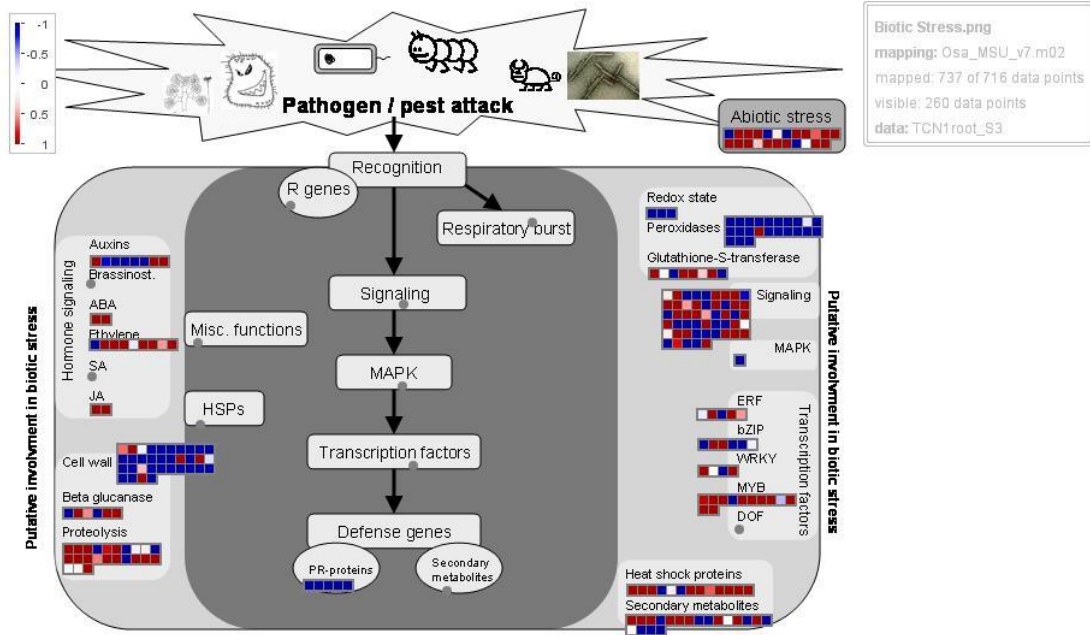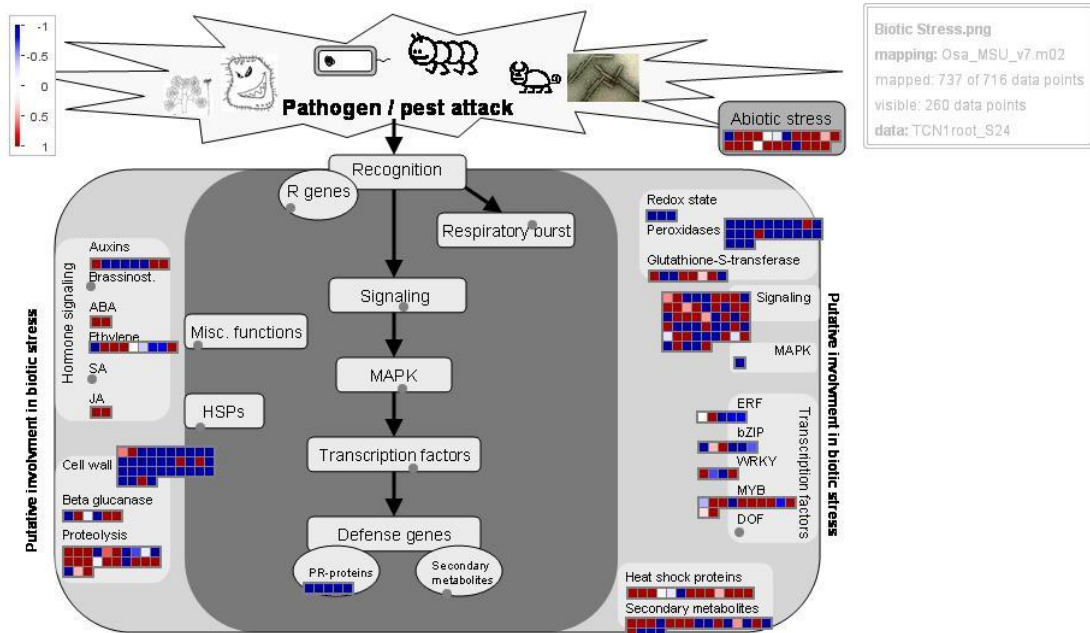

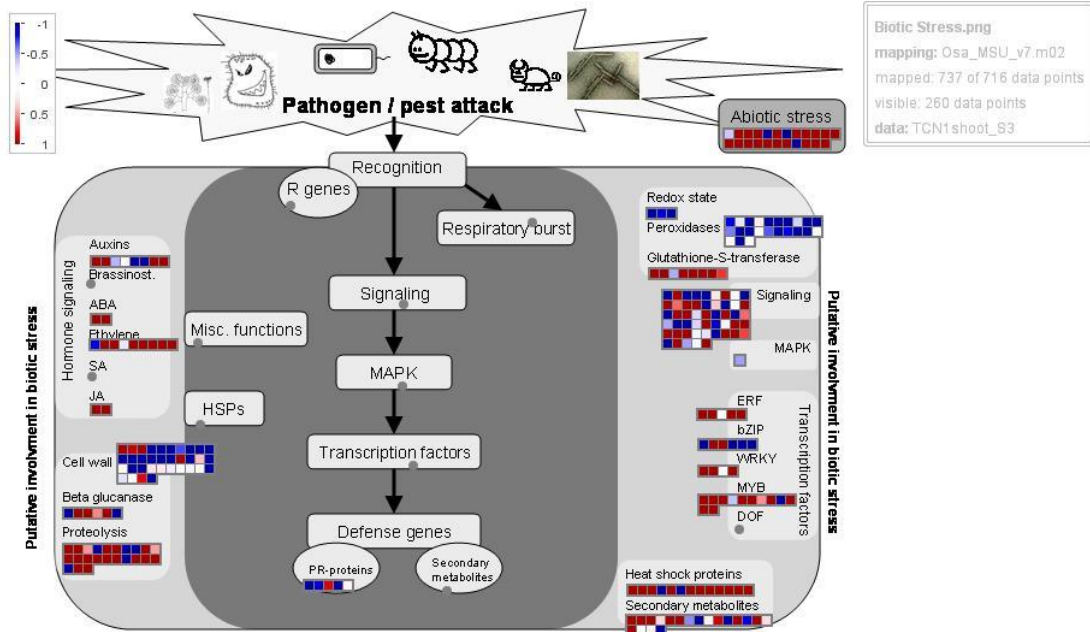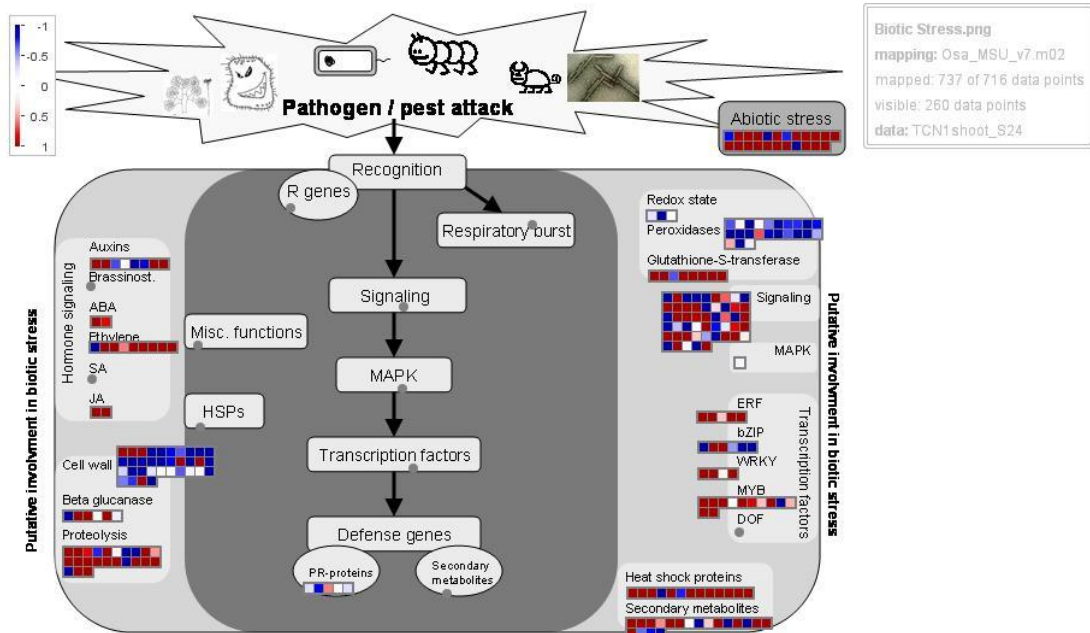

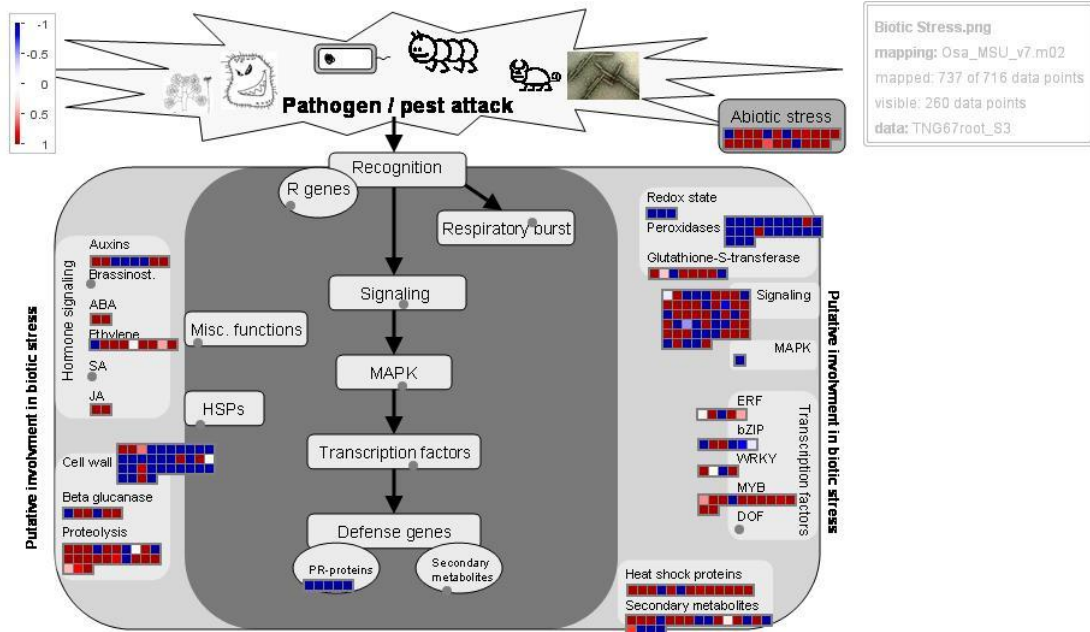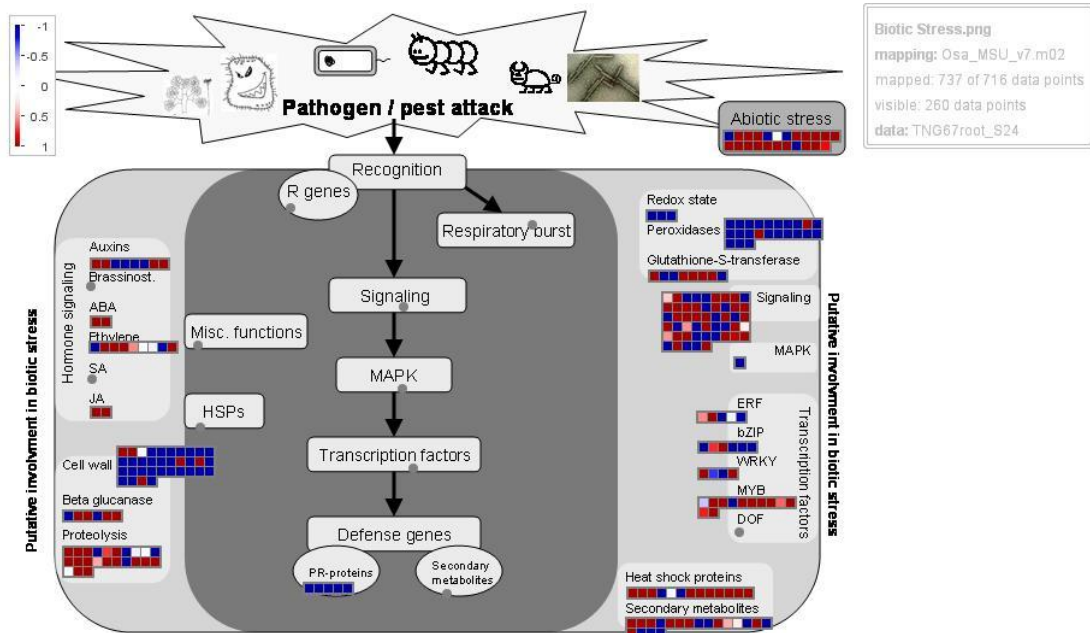

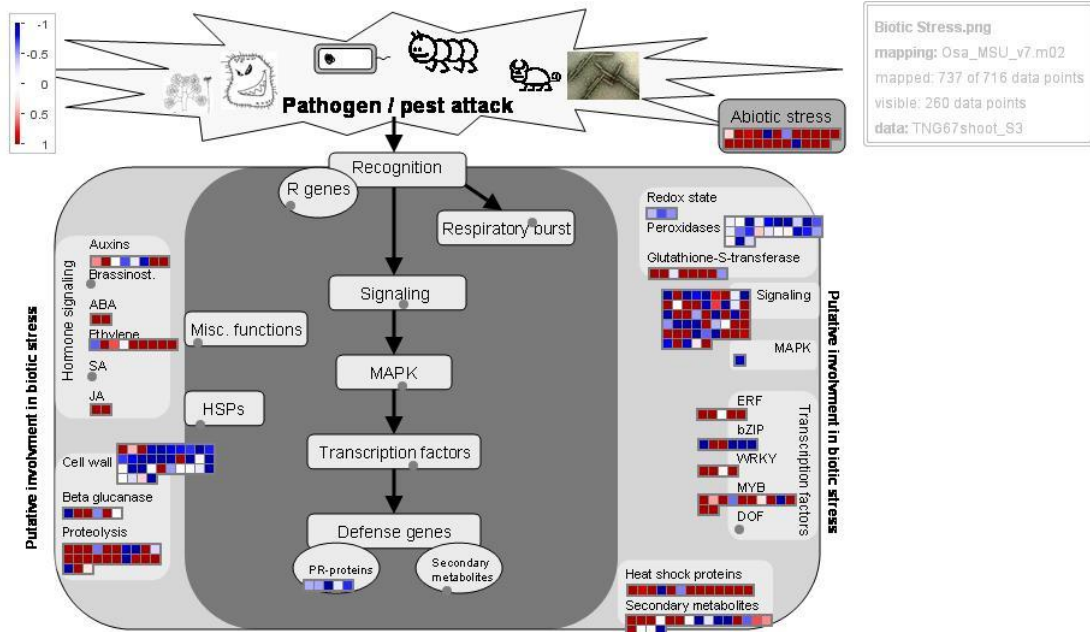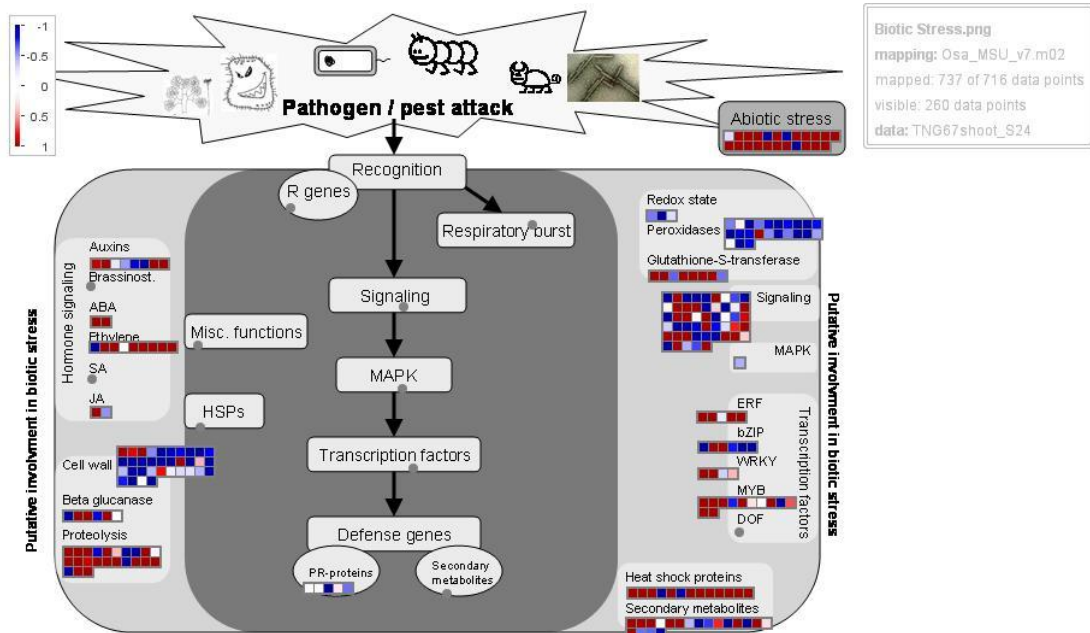

Supplement: s1 [file s1]

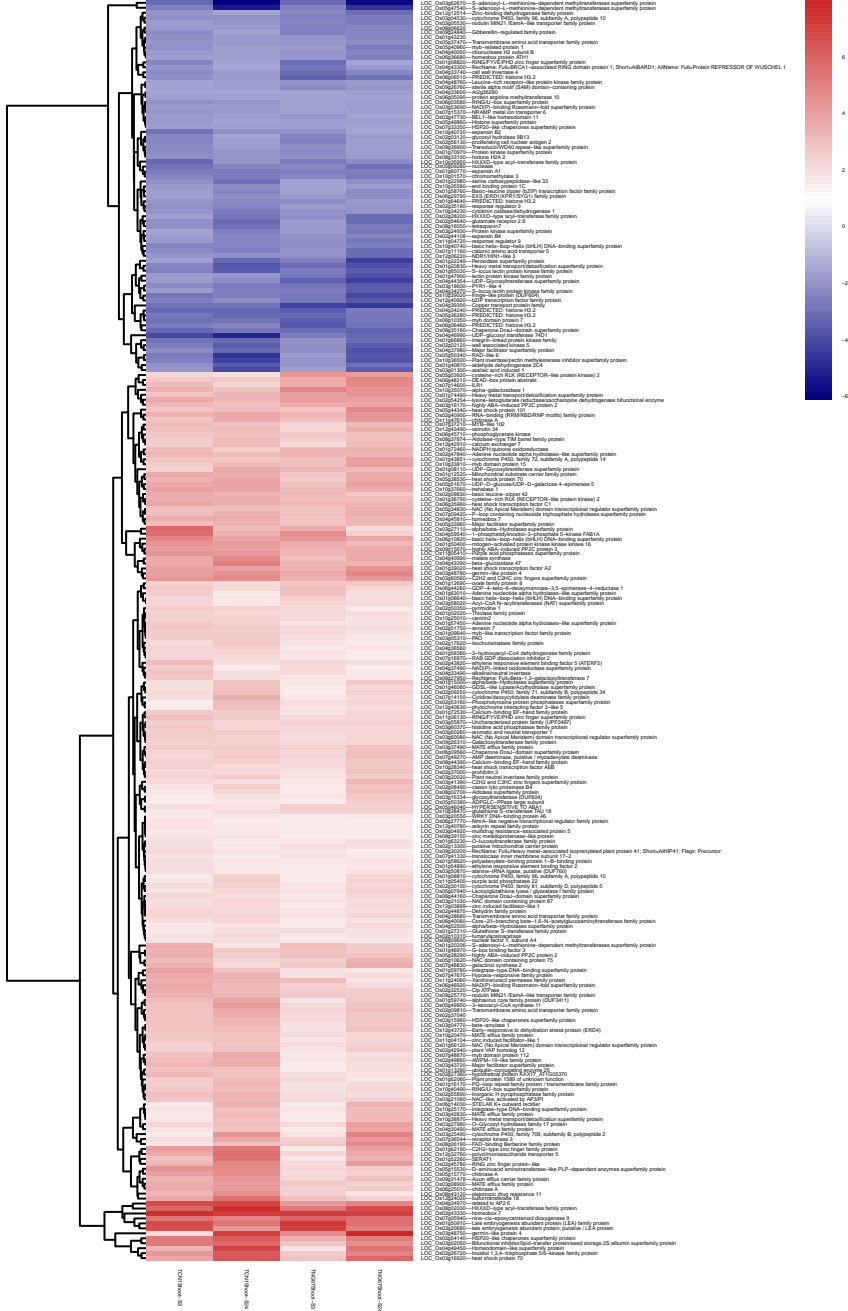

Supplement: s1 [file s1]
